# Supplementary material for: Modification of thermally activated delayed fluorescence emitters comprising acridan–pyrimidine moieties for efficient sky-blue to greenish-blue OLEDs
Source: Royal Society of Chemistry journal article supplement (doi:10.1039/d3tc02820h), 2023-01-01
Supplement: d3tc02820h1.pdf [file d3tc02820h1.pdf]

## Supporting material

# Modification of Thermally Activated Delayed Fluorescence Emitters Comprising Acridan- pyrimidine Moieties for Efficient Sky-Blue to Greenish-Blue OLEDs

Yi-Zhen Li<sup>a</sup>, Hsuan-Chi Liang<sup>a</sup>, Chia-Hsun Chen<sup>b</sup>, Ching-Huang Chiu<sup>b</sup>,  
Bo-Yen Lin<sup>c\*</sup>, Jake A. Tan<sup>d\*</sup>, Jiun-Haw Lee<sup>b\*</sup>, Tien-Lung Chiu<sup>e\*</sup> and Man-kit  
Leung<sup>a,f\*</sup>

<sup>a</sup> Department of Chemistry, National Taiwan University, Taipei 10617, Taiwan.

<sup>b</sup> Graduate Institute of Photonics and Optoelectronics and Department of Electrical Engineering,  
National Taiwan University, Taipei 10617, Taiwan.

<sup>c</sup> Department of Opto-Electronic Engineering, National Dong Hwa University,  
Shoufeng, Hualien 974301, Taiwan.

<sup>d</sup> Department of Chemistry, Gottwald Center for the Sciences, University of Richmond,  
Richmond, Virginia 23173, USA

<sup>e</sup> Department of Electrical Engineering, Yuan Ze University, Chung-Li, Taoyuan 32003, Taiwan.

<sup>f</sup> Advanced Research Center for Green Materials Science and Technology, National Taiwan  
University No. 1, Sec. 4, Roosevelt Rd., Taipei 10617, Taiwan (R.O.C.)

Email: boyenlin@gms.ndhu.edu.tw ; jiunhawlee@ntu.edu.tw; mkleung@ntu.edu.tw;

tlchiu@saturn.yzu.edu.tw; jake.tan@richmond.edu

## Experimental Section

### 2-(2,4,5-trifluorophenyl)pyrimidine (1)

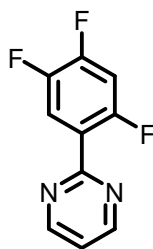

A mixture of 2,4,5-trifluorophenylboronic acid (5.842 g, 33.21 mmol), 2-bromopyrimidine (3.5 g, 22.14 mmol), Pd(OAc)<sub>2</sub> (0.2485 g, 1.107 mmol) and triphenylphosphine (1.155 g, 4.428 mmol) were flushed with argon then methoxymethane (22 mL) and potassium carbonate solution (21 mL, 2.7 M, 56.7 mmol) were added respectively. The resulting mixture was refluxed at 105°C for 2.5 hours. After the reaction, the solvent was removed by vacuum distillation. The residue was extracted with dichloromethane and water. The organic layer was dried over anhydrous MgSO<sub>4</sub> and removed under reduced pressure. The crude product was purified through column chromatography with dichloromethane and afford compound **1** as a white solid (3.2970 g, 70 % yield).

<sup>1</sup>H NMR (400 MHz, Acetone-*d*<sub>6</sub>): δ 8.93 (d, *J* = 4.8 Hz, 2 H), δ 8.10-8.03 (m, 1 H), δ 7.48 (t, *J* = 4.8 Hz, 1 H), δ 7.44-7.37 (m, 1 H); <sup>13</sup>C NMR (100 MHz, Chloroform-*d*<sub>1</sub>): δ 161.73 (d, <sup>3</sup>*J*<sub>CF</sub> = 6 Hz), 157.35, 156.70 (ddd, <sup>1</sup>*J*<sub>CF</sub> = 254 Hz, <sup>2</sup>*J*<sub>CF</sub> = 9 Hz, <sup>3</sup>*J*<sub>CF</sub> = 2 Hz), 151.37 (ddd, <sup>1</sup>*J*<sub>CF</sub> = 254 Hz, <sup>2</sup>*J*<sub>CF</sub> = 15 Hz, <sup>3</sup>*J*<sub>CF</sub> = 12 Hz), 146.80 (ddd, <sup>1</sup>*J*<sub>CF</sub> = 244 Hz, <sup>2</sup>*J*<sub>CF</sub> = 13 Hz, <sup>3</sup>*J*<sub>CF</sub> = 4 Hz), 122.7, 119.70 (d, <sup>2</sup>*J*<sub>CF</sub> = 21 Hz), 107.02 (d, <sup>2</sup>*J*<sub>CF</sub> = 21 Hz), 106.87 (d, <sup>2</sup>*J*<sub>CF</sub> = 21 Hz); HRMS calcd. for C<sub>10</sub>H<sub>6</sub>F<sub>3</sub>N<sub>2</sub> (M+1<sup>+</sup>) 211.0478, obsd. 211.0486

**Figure S1.**  $^1\text{H}$  NMR spectrum of compound (1).

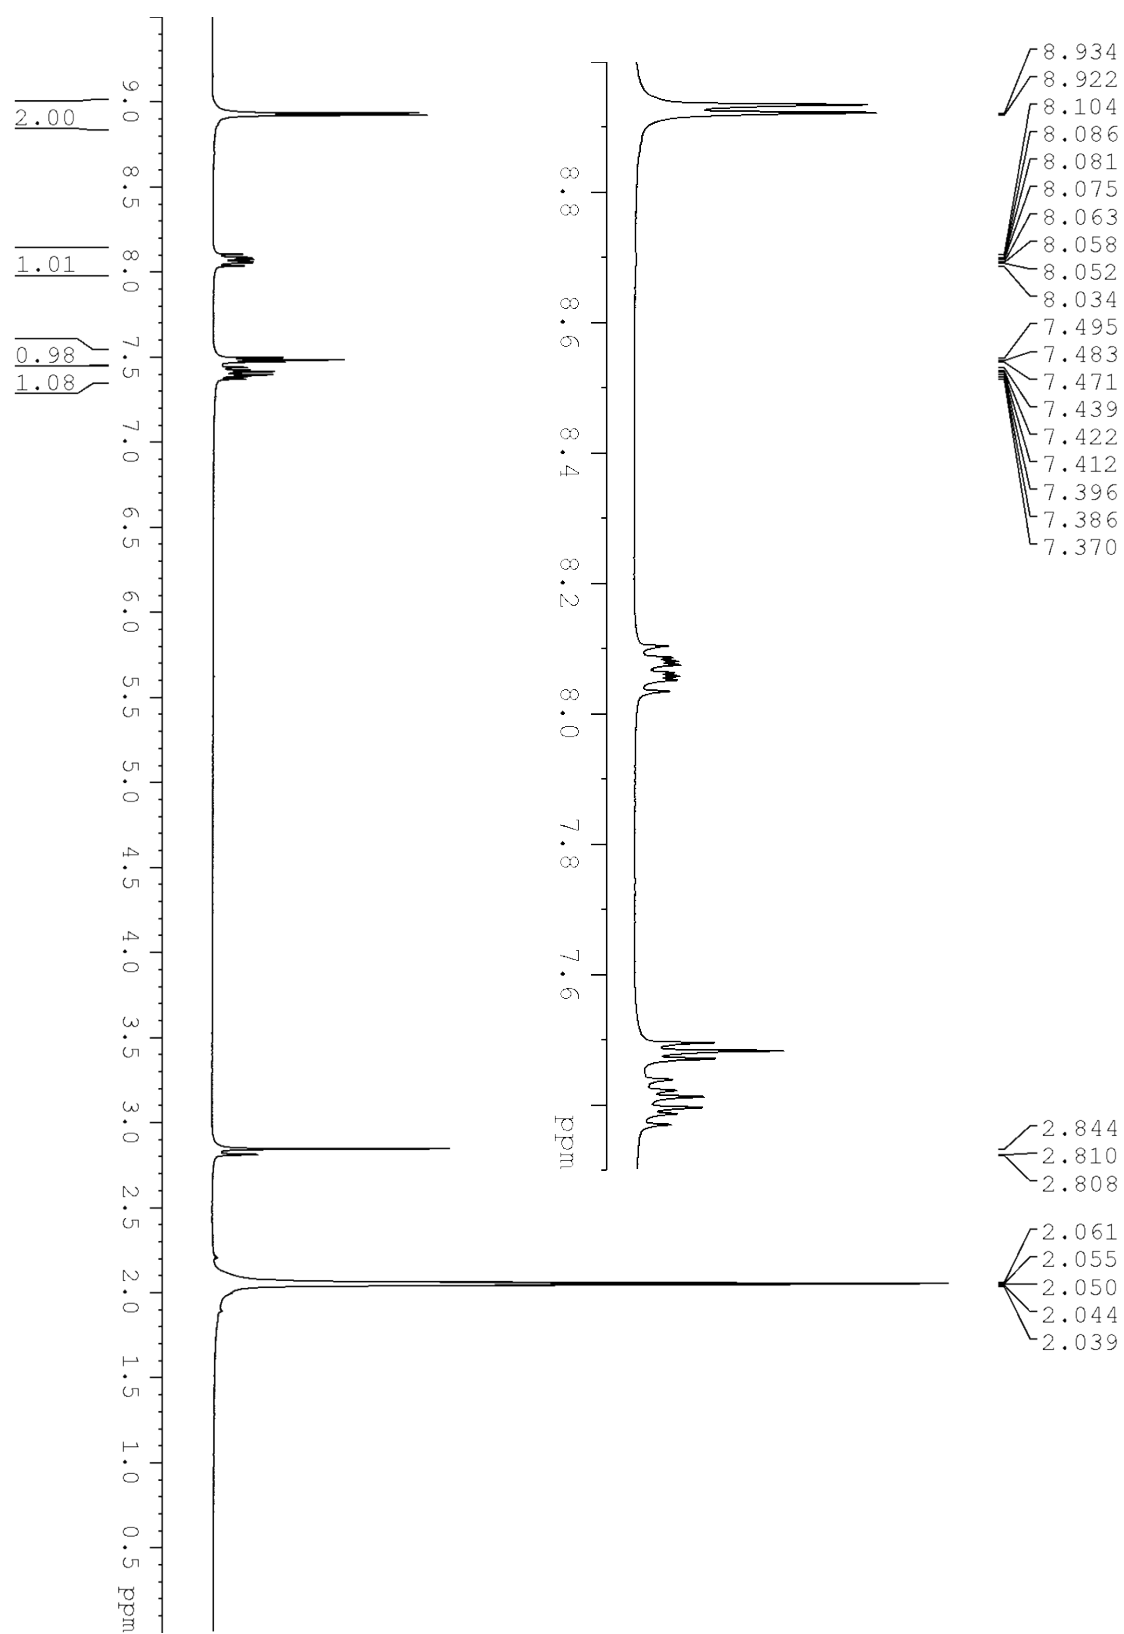

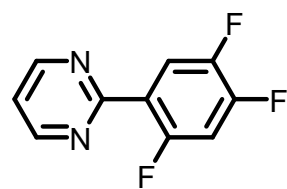

Figure S2.  $^{13}\text{C}$  NMR spectrum of compound (1).

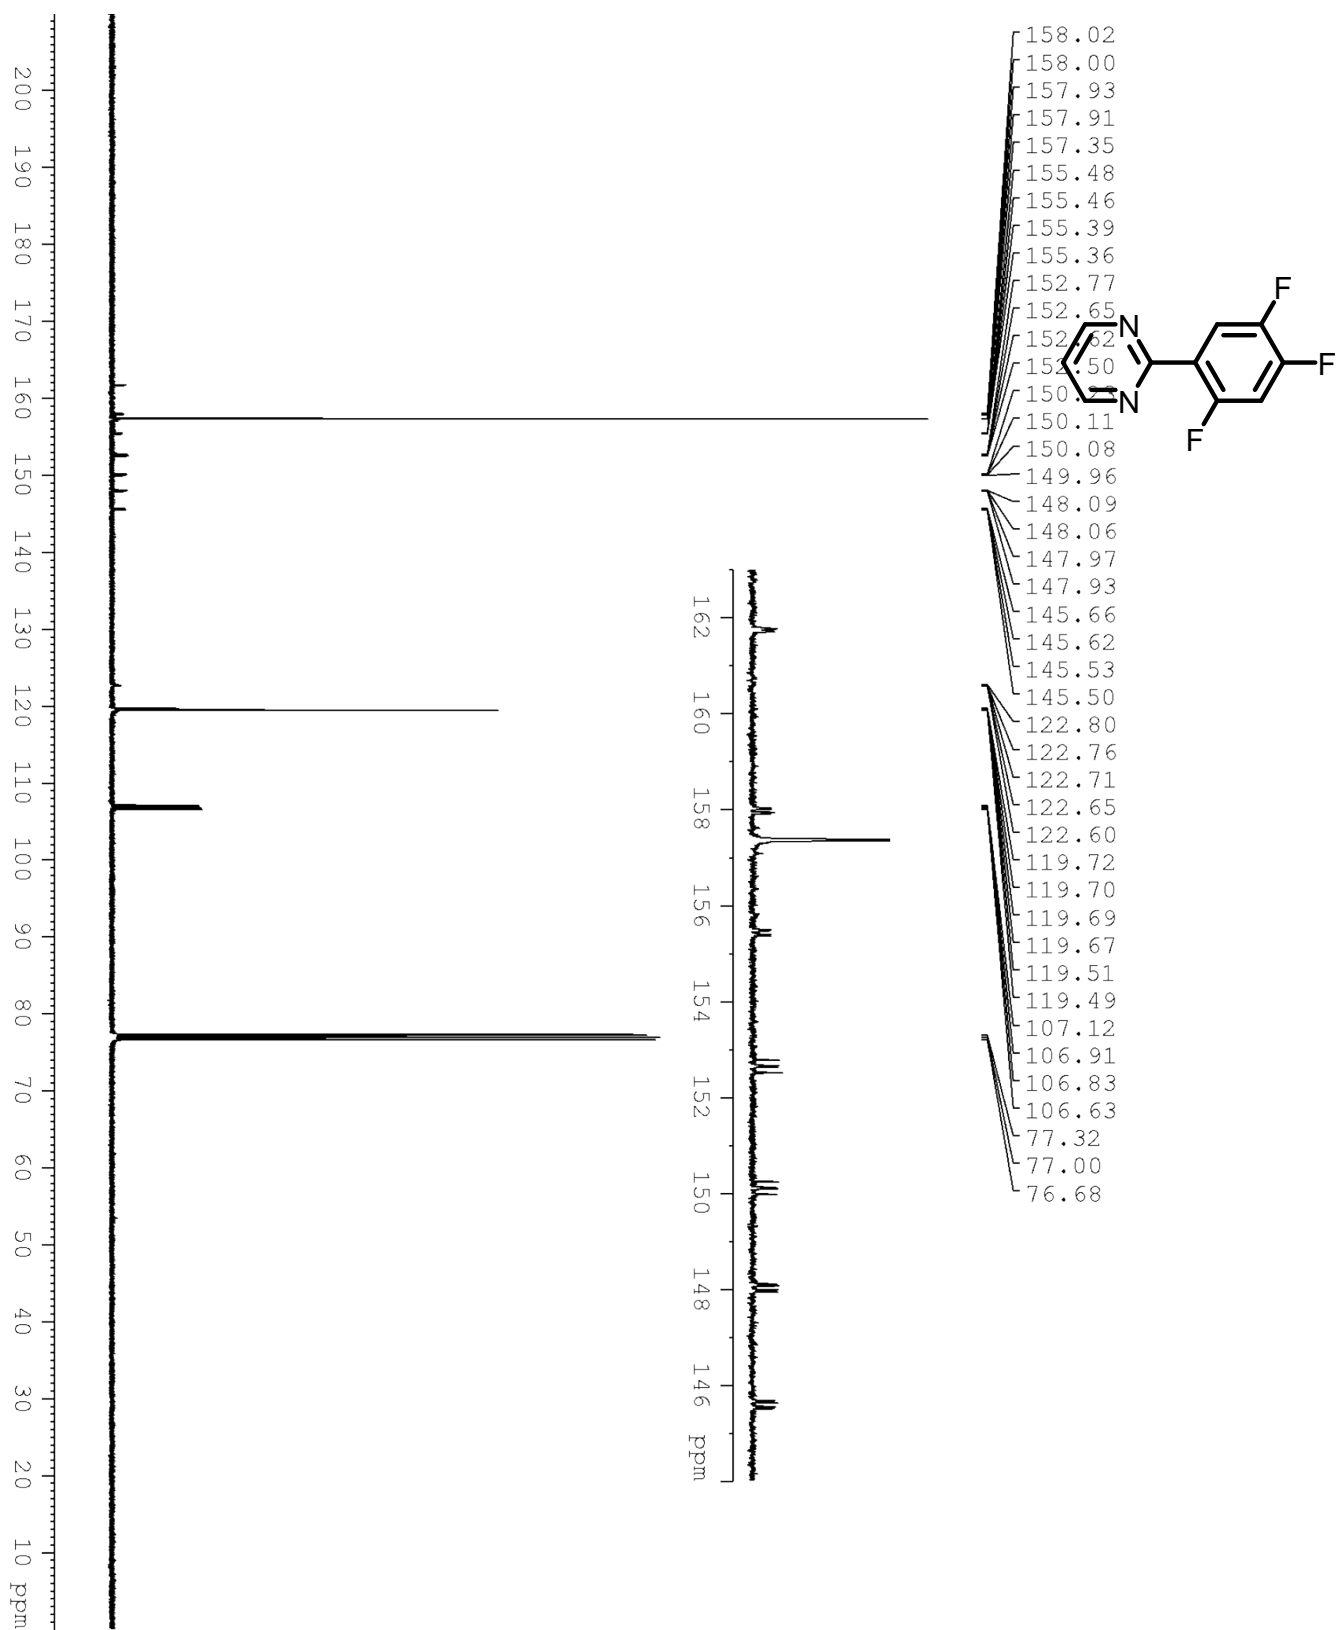

Figure S3.  $^{19}\text{F}$  NMR spectrum of compound (1).

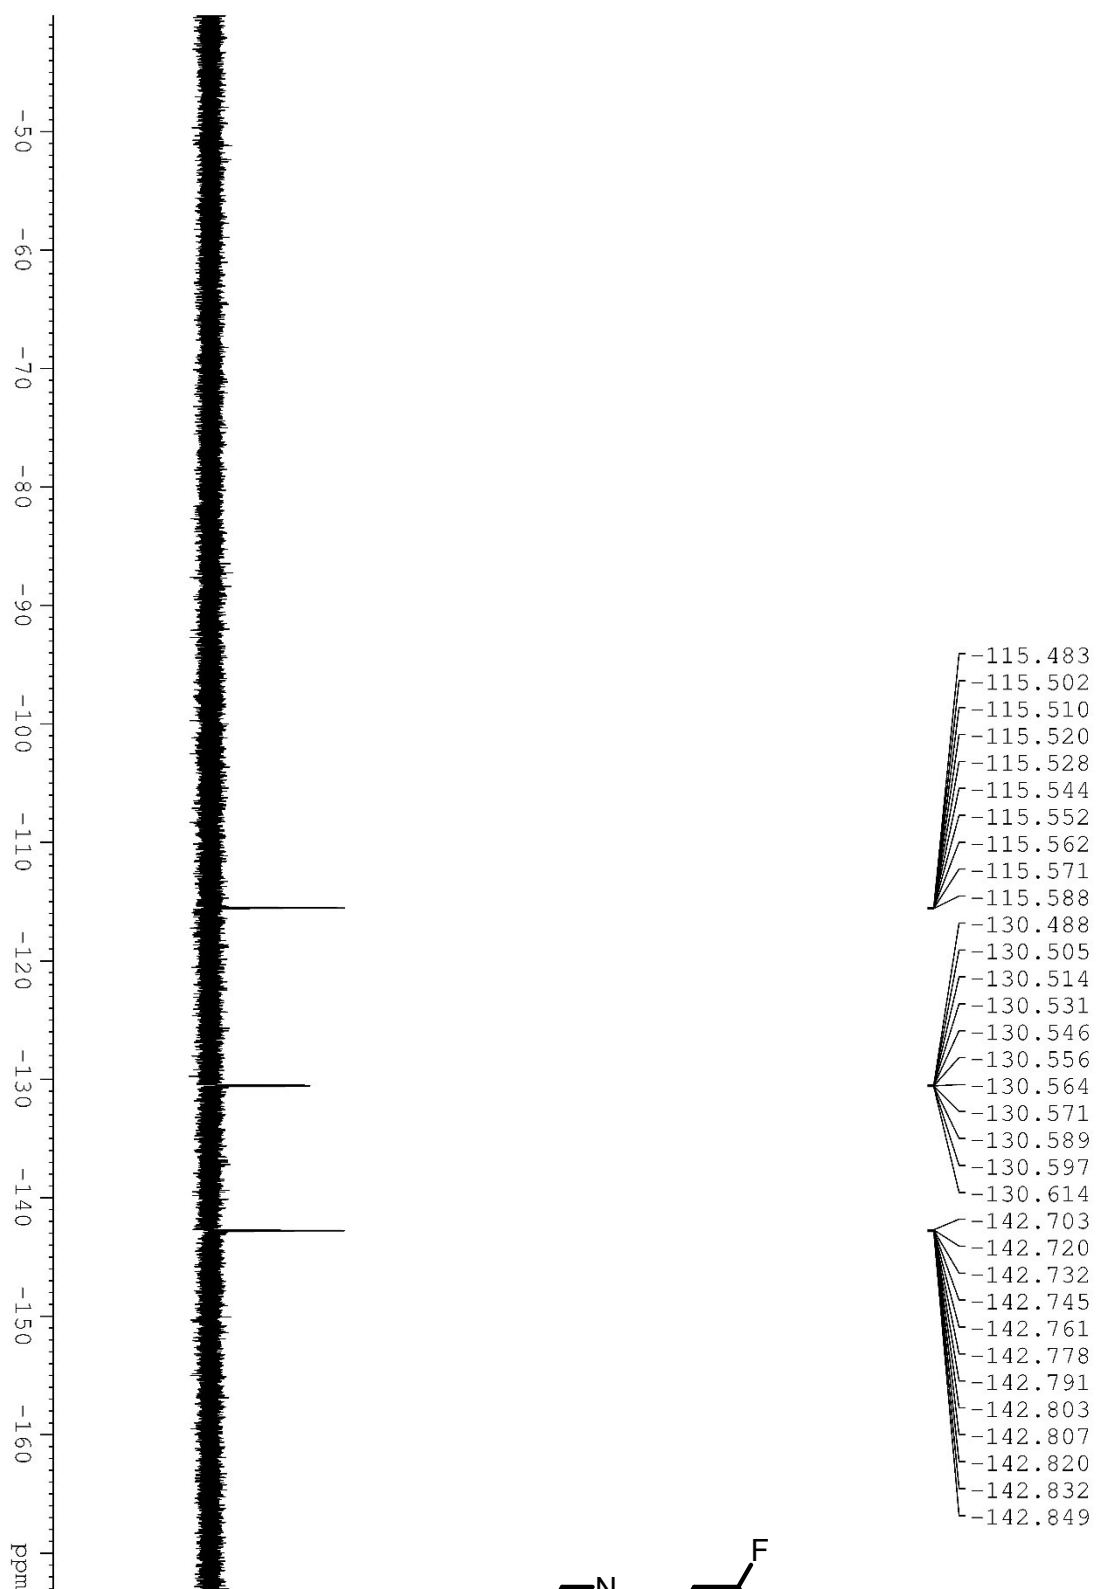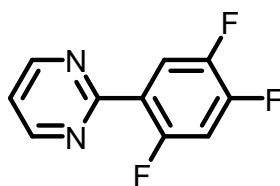

**10-(2,5-difluoro-4-(pyrimidin-2-yl)phenyl)-9,9-dimethyl-9,10-dihydroacridine (3)**

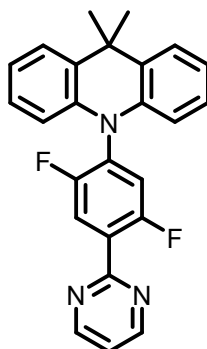

A mixture of **1** (0.8 g, 3.807 mmol), 9,9-dimethyl-9,10-dihydroacridine (0.956 g, 4.568 mmol) and  $\text{Cs}_2\text{CO}_3$  (2.480 g, 7.614 mmol) were dissolved in dimethyl sulfoxide (3.8 mL) under argon atmosphere. The mixture was stirred at 120°C for 16 hours. After the reaction, the solvent was removed by vacuum distillation. The residue was extracted with dichloromethane and water. The organic layer was dried over anhydrous  $\text{MgSO}_4$  and removed under reduced pressure. The crude product was purified through column chromatography with dichloromethane and afford compound **3** as a white solid (0.524 g, 35 % yield).

$^1\text{H}$  NMR (400 MHz, Acetone- $d_6$ ):  $\delta$  9.01 (d,  $J = 4.8$  Hz, 2 H),  $\delta$  8.21 (dd,  $J = 10.4, 6.8$  Hz, 1 H),  $\delta$  7.57-7.53 (m, 4 H),  $\delta$  7.07 (td,  $J = 7.2, 1.6$  Hz, 2 H),  $\delta$  6.99 (td,  $J = 7.2, 1.6$  Hz, 2 H),  $\delta$  6.45 (d,  $J = 6.8$  Hz, 2 H), 1.69 (s, 6 H);  $^{13}\text{C}$  NMR (100 MHz, Acetone- $d_6$ ):  $\delta$  162.58 (dd,  $^2J_{\text{CF}} = 6$  Hz,  $^3J_{\text{CF}} = 2$  Hz), 159.46 (dd,  $^1J_{\text{CF}} = 142$  Hz,  $^2J_{\text{CF}} = 2$  Hz), 158.67, 156.96 (dd,  $^1J_{\text{CF}} = 133$  Hz,  $^2J_{\text{CF}} = 3$  Hz), 140.53, 131.58 (dd,  $^1J = 17$  Hz,  $^2J = 10$  Hz), 131.43, 129.56 (dd,  $^1J = 12$  Hz,  $^2J = 8$  Hz), 127.76, 126.36, 122.64 (dd,  $^1J = 25$  Hz,  $^2J = 2$  Hz), 122.48, 121.33, 120.83 (dd,  $^1J = 24$  Hz,  $^2J = 3$  Hz), 114.28, 36.77, 31.32; HRMS calcd. for  $\text{C}_{25}\text{H}_{20}\text{F}_2\text{N}_3$  ( $\text{M}+1^+$ ) 400.1620, obsd. 400.1626

**Figure S4.**  $^1\text{H}$  NMR spectrum of compound (**3**).

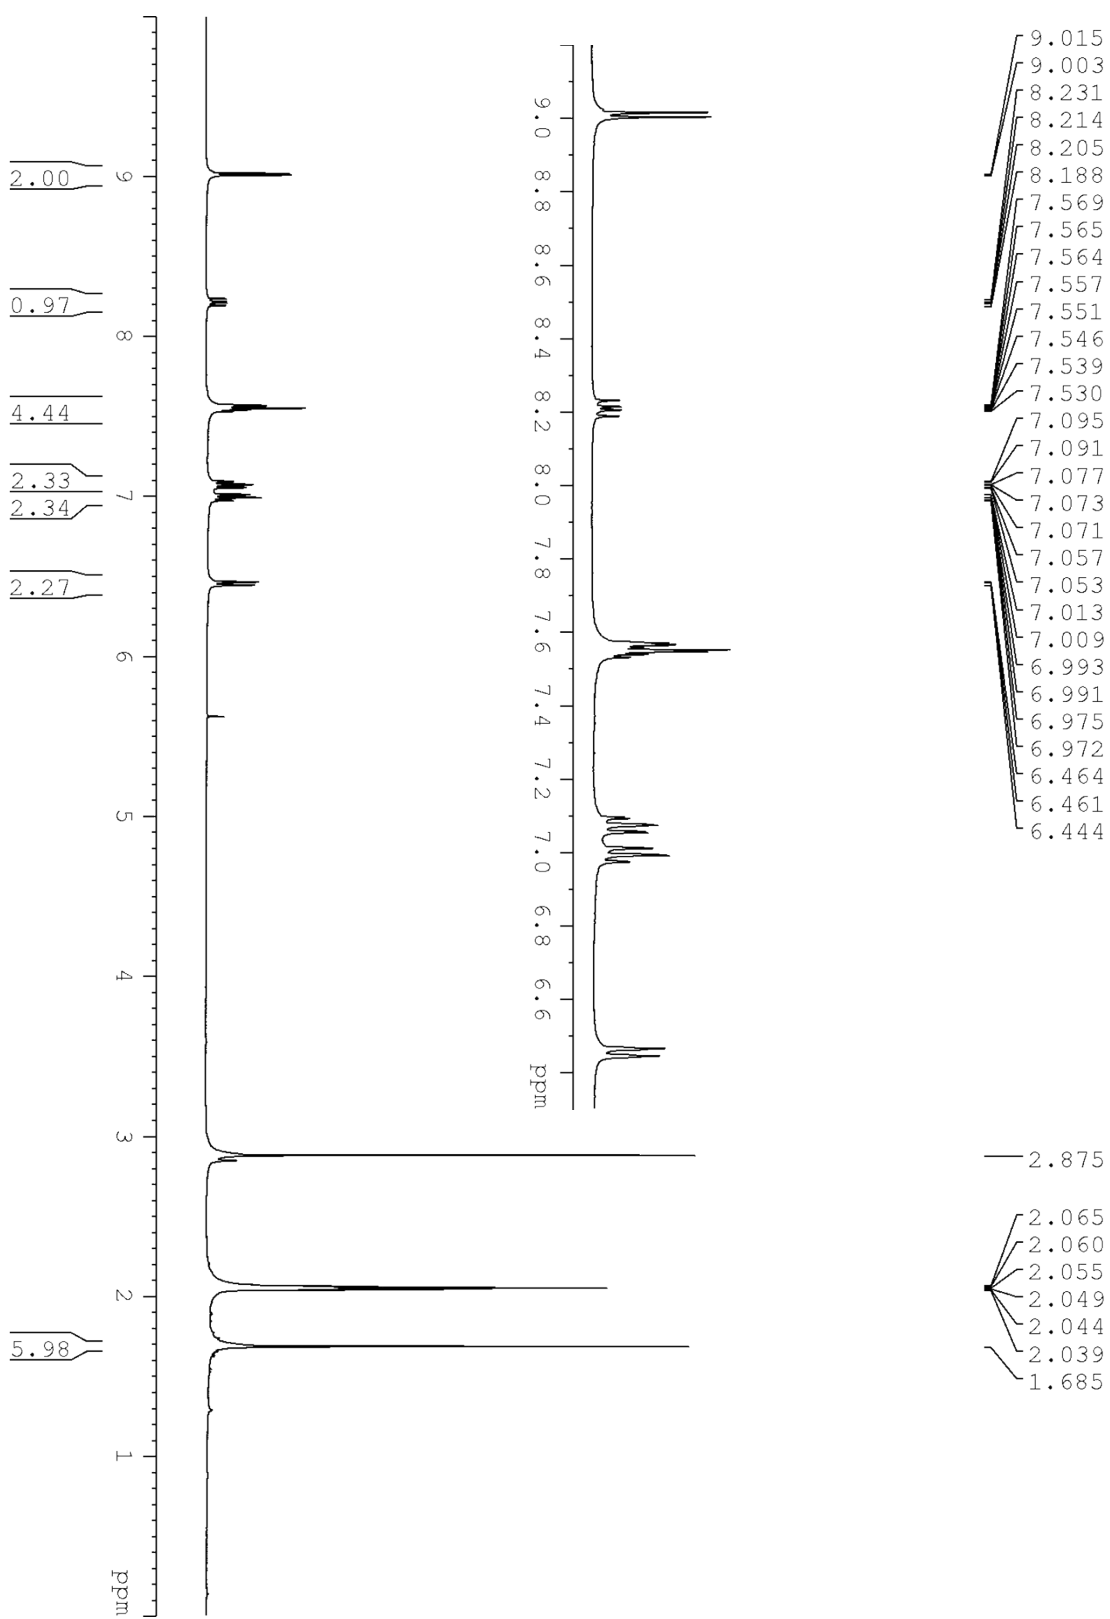



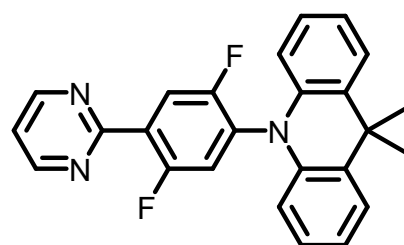

Figure S5.  $^{13}\text{C}$  NMR spectrum of compound (3).

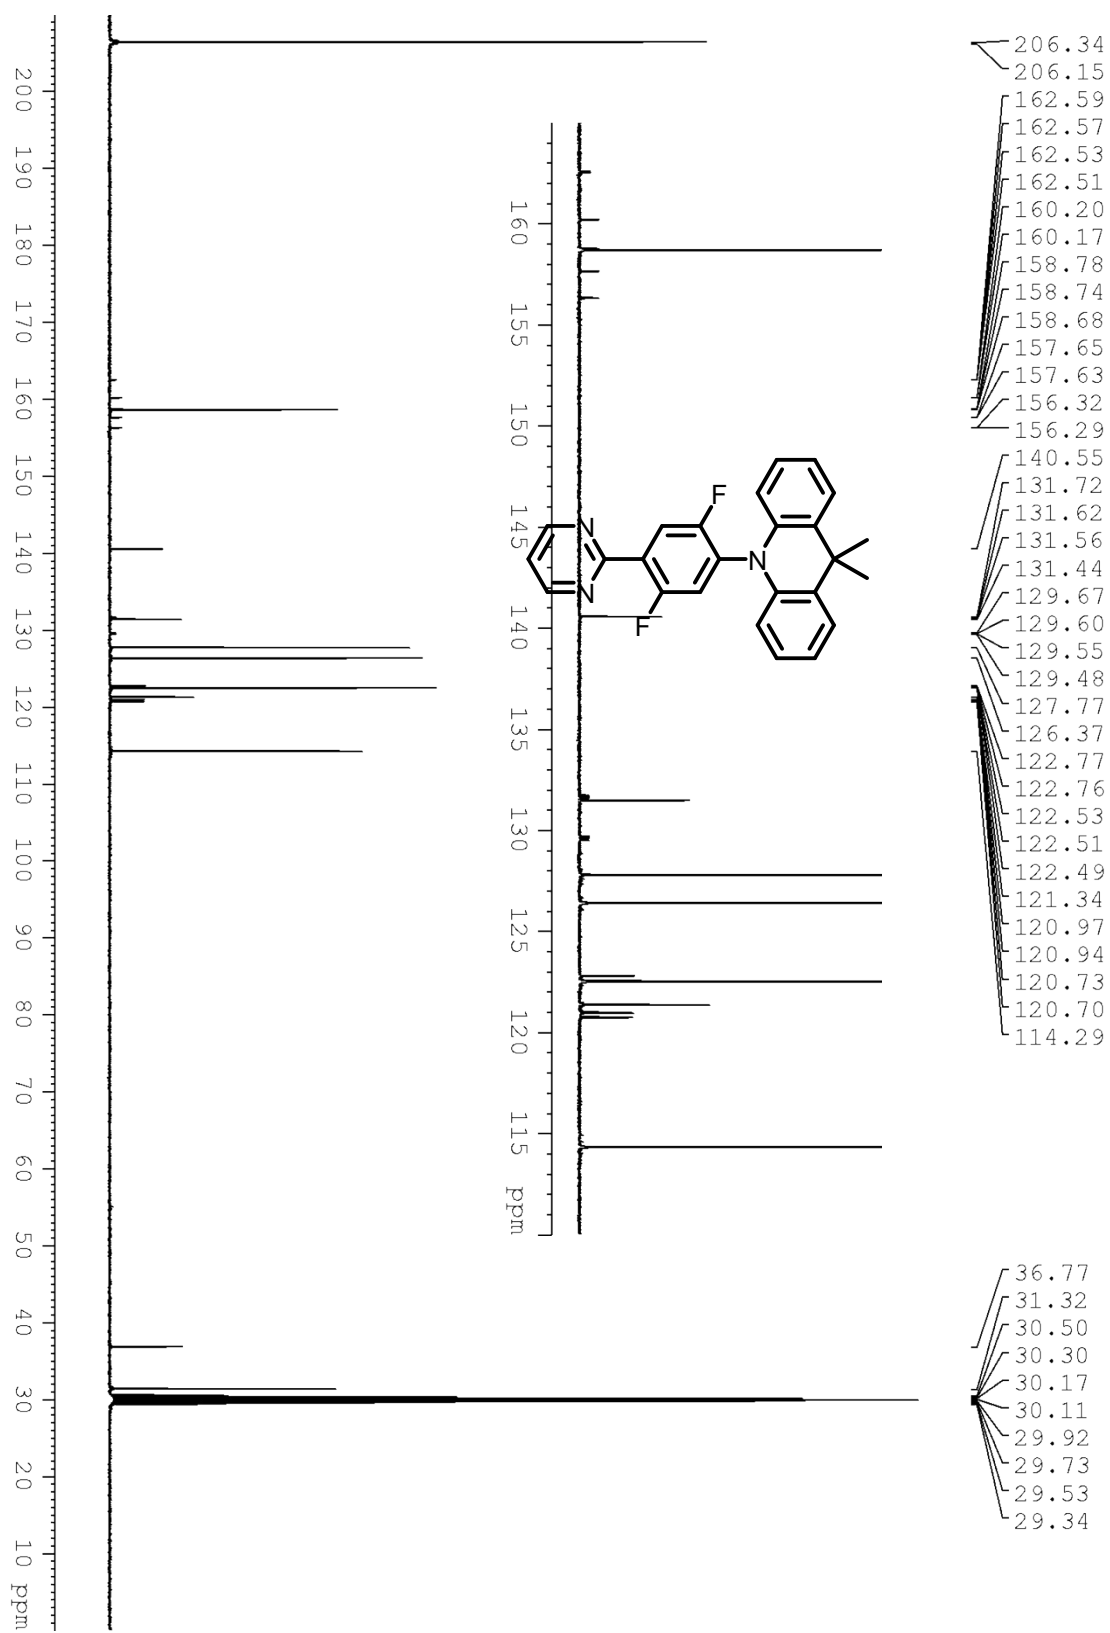



**Figure S6.**  $^{19}\text{F}$  NMR spectrum of compound (**3**).

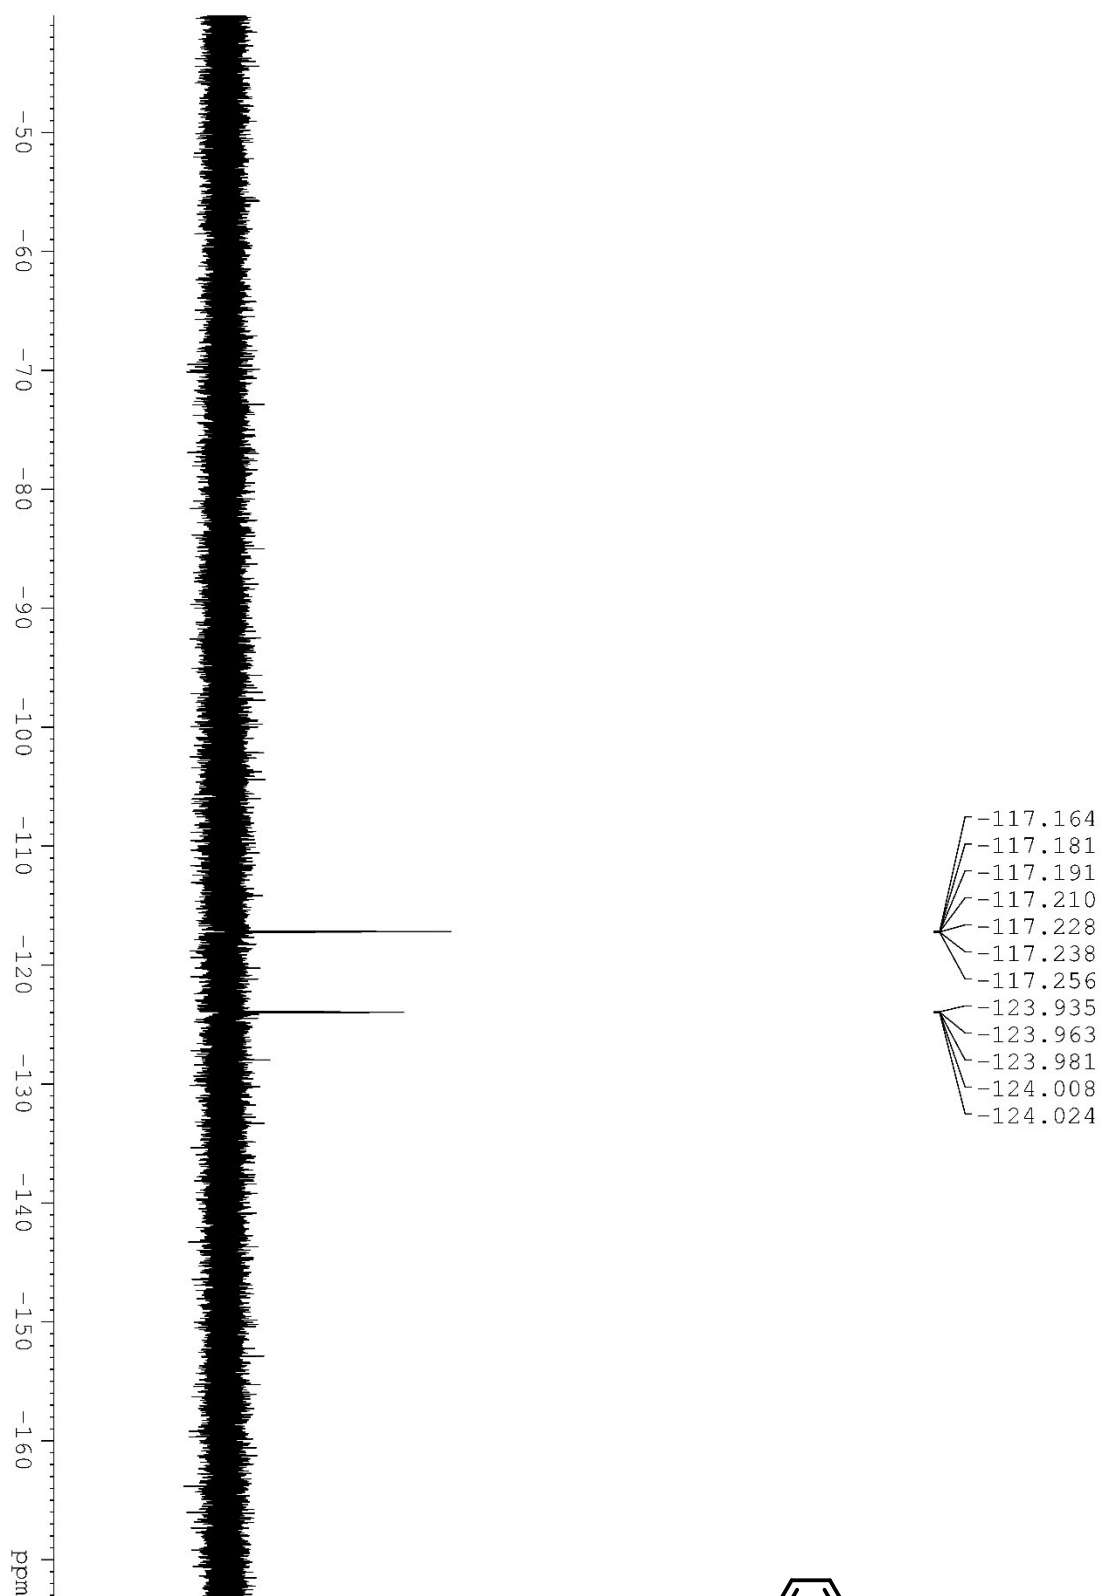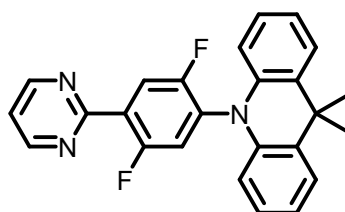

**10-(2,5-di(9H-carbazol-9-yl)-4-(pyrimidin-2-yl)phenyl)-9,9-dimethyl-9,10-dihydroacridine (4Ac25CzPy)**

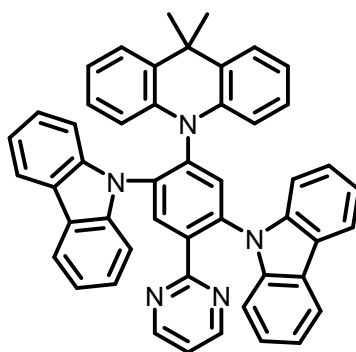

A mixture of **3** (1.534 g, 3.8 mmol), carbazole (2.565 g, 15.34 mmol) and  $\text{Cs}_2\text{CO}_3$  (3.714 g, 11.4 mmol) was dissolved in dimethyl sulfoxide (3.8 mL) under argon atmosphere and stirred at 120°C for 16 hours. After the reaction, the solvent was removed by vacuum distillation. The residue was extracted with dichloromethane and water. The organic layer was dried over anhydrous  $\text{MgSO}_4$  and removed under reduced pressure. The crude product was purified through column chromatography with 1:1 v/v mixture of hexane and dichloromethane. The product was heat flushed in acetone and afford **4Ac25CzPy** as a yellow solid (2.0 g, 76 % yield).

$^1\text{H}$  NMR (400 MHz, Methylene Chloride- $d_2$ ):  $\delta$  8.65 (s, 1 H),  $\delta$  8.38 (d,  $J = 4.8$  Hz, 2 H),  $\delta$  8.12 (d,  $J = 8$  Hz, 2 H),  $\delta$  8.12 (s, 1 H),  $\delta$  7.98-7.96 (m, 2 H),  $\delta$  7.43 (d,  $J = 8$  Hz, 2 H),  $\delta$  7.35 (t,  $J = 8$  Hz, 2 H),  $\delta$  7.27-7.21 (m, 6 H), 7.17-7.11 (m, 4 H), 7.06 (t,  $J = 8$  Hz, 2 H), 6.94-6.91 (m, 3 H),  $\delta$  6.87 (t,  $J = 7.4$  Hz, 2 H), 1.62 (s, 3 H), 0.06 (s, 3 H);  $^{13}\text{C}$  NMR (100 MHz, Methylene Chloride- $d_2$ ):  $\delta$  164.35, 157.60, 142.09, 141.65, 141.37, 140.58, 138.90, 137.88, 136.78, 135.98, 131.32, 126.69, 126.53, 125.97, 125.27, 124.18, 123.82, 121.84, 120.77, 120.55, 120.40, 120.38, 119.80, 114.26, 110.99, 110.08, 36.07; HRMS calcd. for  $\text{C}_{49}\text{H}_{36}\text{N}_5$  ( $\text{M}+1^+$ ) 694.2965, obsd. 694.2959; Elemental analysis calcd. for C (84.82%), N (10.09%), H (5.08%), obsd. C (84.630%), N (10.090%), H (4.949%)

Figure S7. <sup>1</sup>H NMR spectrum of 4Ac25CzPy.

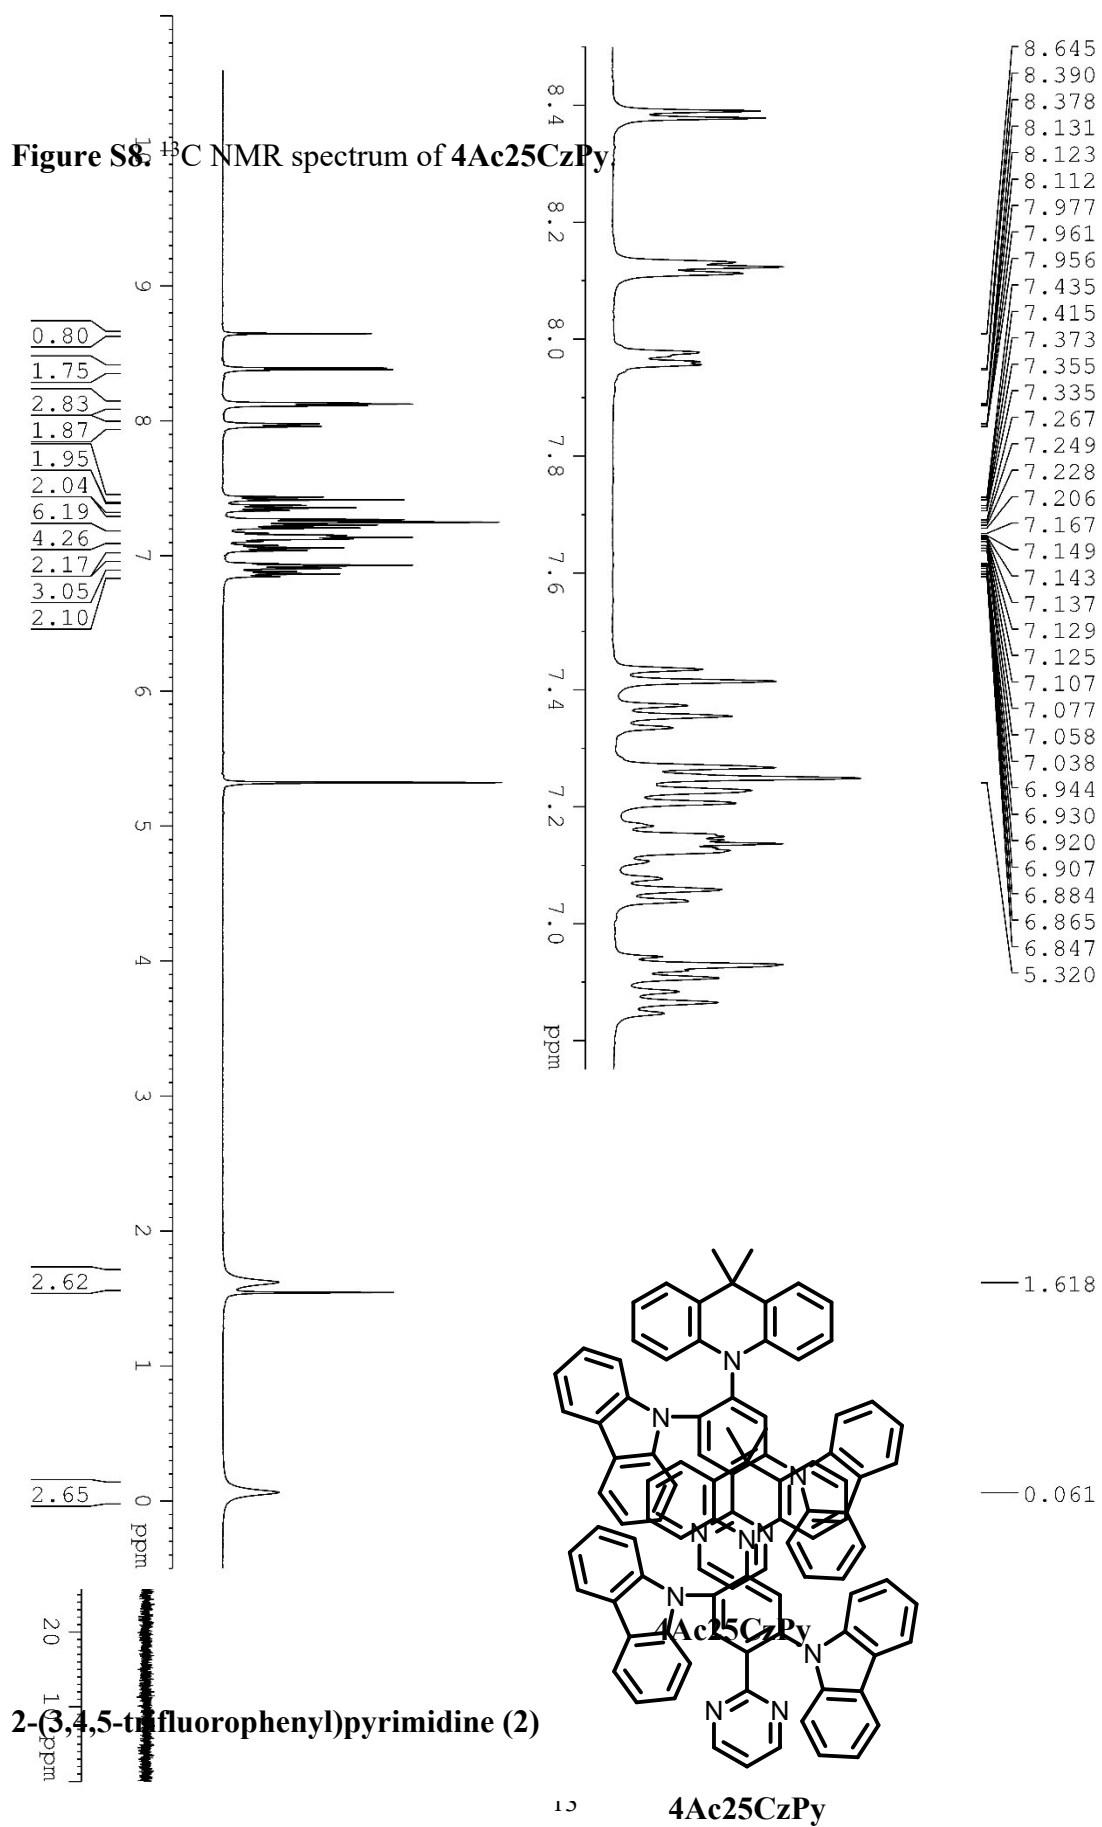

2-(3,4,5-trifluorophenyl)pyrimidine (2)

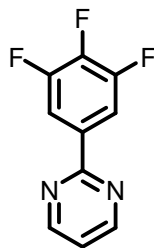

A mixture of 3,4,5-trifluorophenylboronic acid (4.299 g, 30 mmol), 2-bromopyrimidine (1.592 g, 10 mmol),  $K_2CO_3$  (5.526 g, 40 mmol) and  $Pd(PPh_3)_4$  (0.4622 g, 0.4 mmol,) were dissolved in 1,4-dioxane (16 mL) and  $H_2O$  (4 mL) under argon atmosphere. The mixture was stirred at 90 °C for 3 hours. After the reaction, the solvent was removed by vacuum distillation. The residue was dissolved in DCM and washed with water and  $K_2CO_{3(aq)}$ . The organic layer was dried by anhydrous  $MgSO_4$ . The crude was purified through chromatography with Hexanes/ EA = 4/1 as eluent to afford purified product **2** as a white solid (1.281 g, 61 % yield).

$^1H$  NMR (400 MHz, Acetone- $d_6$ ):  $\delta$  8.89 (d,  $J = 4.8$  Hz, 2 H),  $\delta$  8.14 (dd,  $J_1 = 9.2$  Hz,  $J_2 = 7.2$  Hz, 2 H),  $\delta$  7.47 (t,  $J = 4.8$  Hz, 1 H),  $^{13}C$  NMR (100 MHz, Acetone- $d_6$ ):  $\delta$  161.90, 158.71, 152.114 (ddd,  $^1J_{CF} = 248$  Hz,  $^2J_{CF} = 10$  Hz,  $^3J_{CF} = 3.5$  Hz), 142.17 (dt,  $^1J_{CF} = 254$  Hz,  $^2J_{CF} = 16$  Hz), 135.41 (td,  $^2J_{CF} = 8.0$  Hz,  $^3J_{CF} = 4.0$  Hz), 121.46, 112.92 (dd,  $^2J_{CF} = 17$  Hz,  $^3J_{CF} = 7$  Hz); HRMS calcd. for  $C_{10}H_6F_3N_2$  ( $M+1^+$ ) 211.0478, obsd. 211.0483

**Figure S9.**  $^1\text{H}$  NMR spectrum of compound (2).

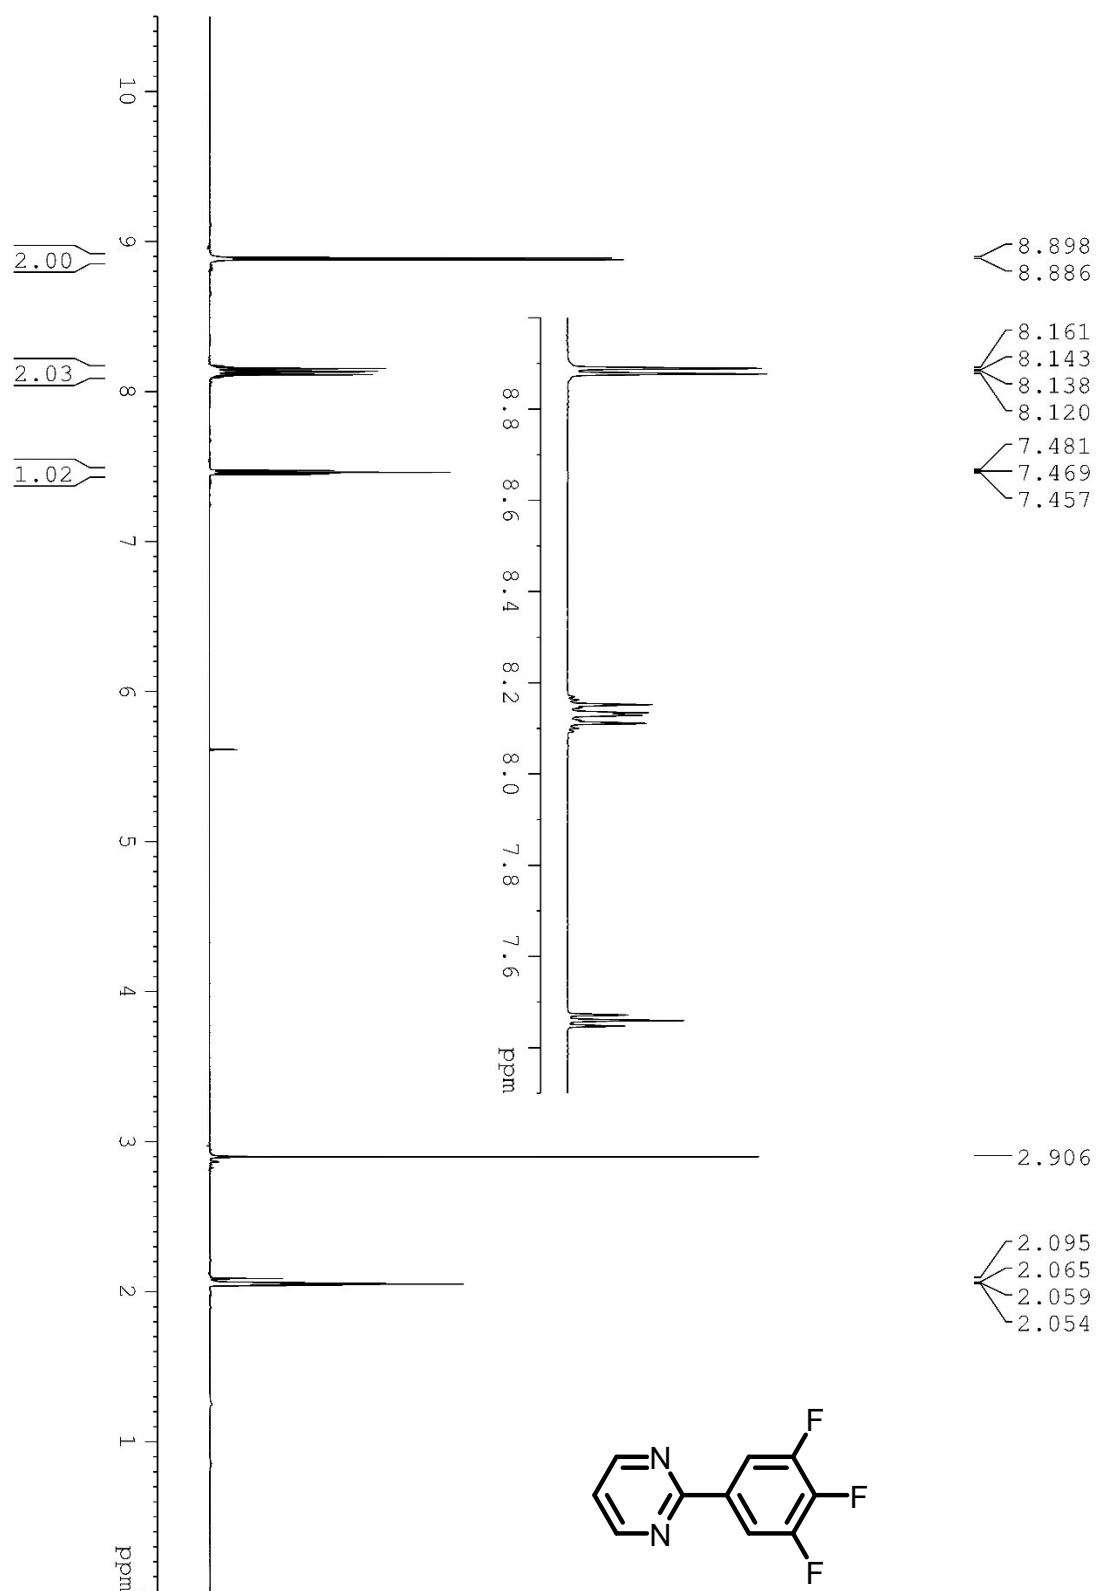



Figure S10.  $^{13}\text{C}$  NMR spectrum of compound (2).

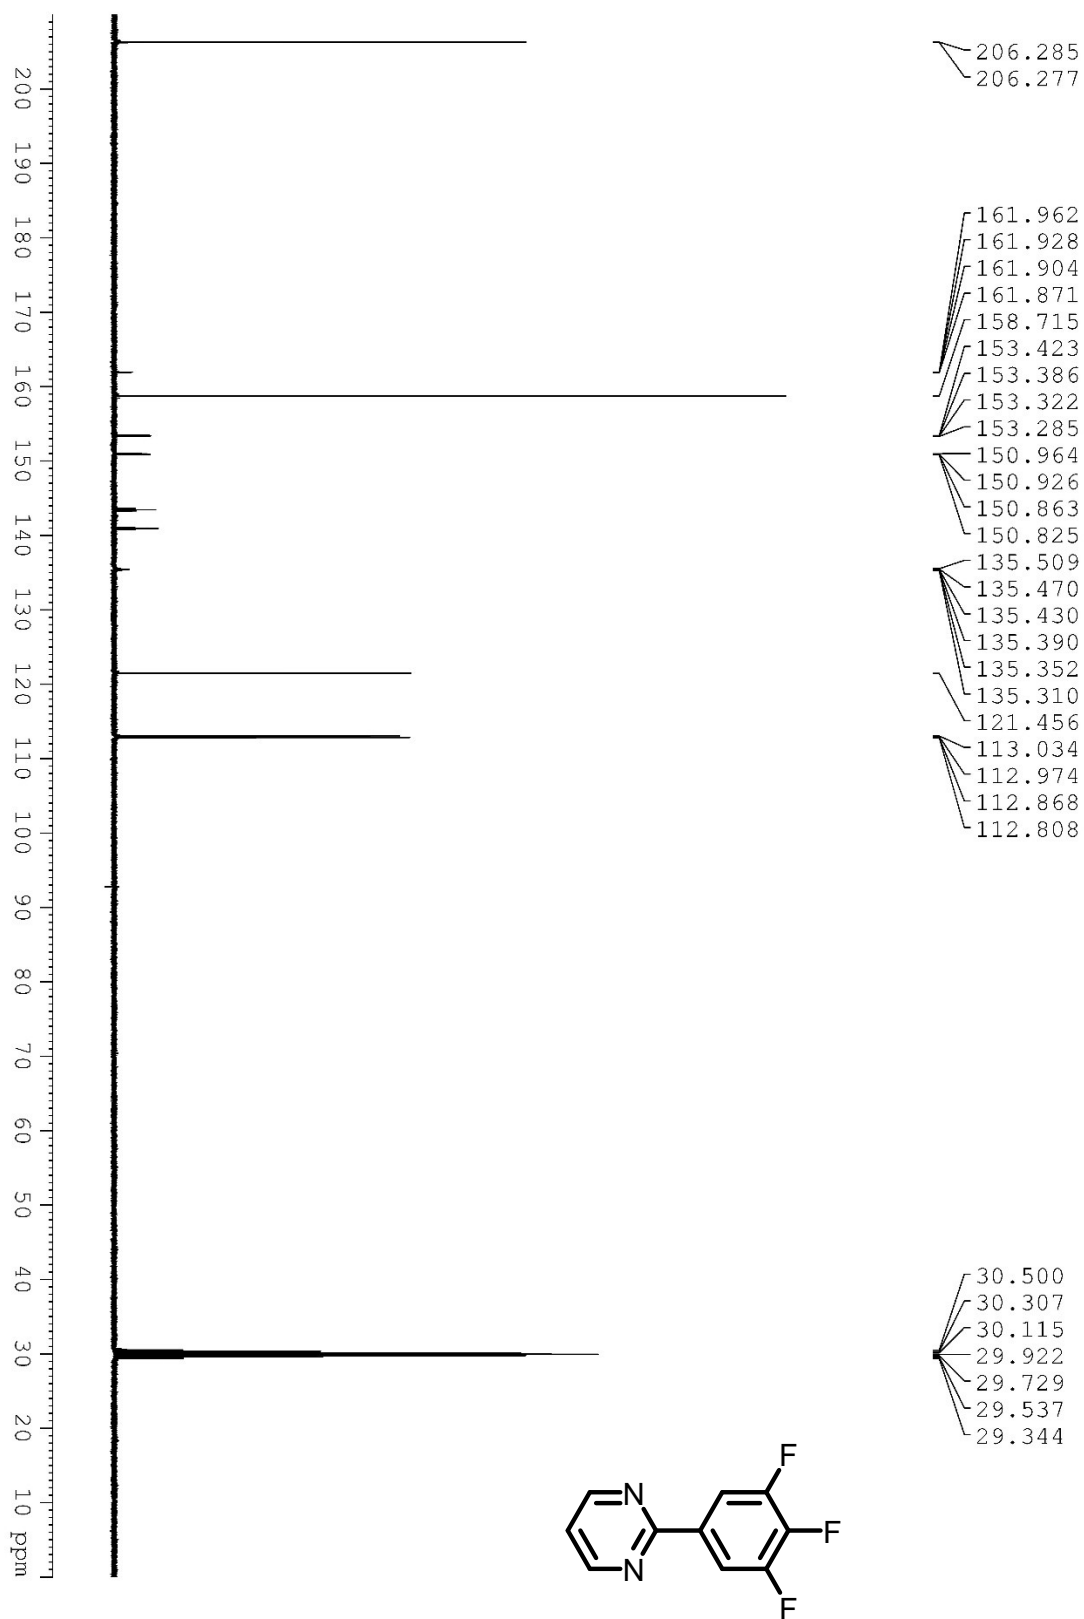

Figure S11.  $^{19}\text{F}$  NMR spectrum of compound (2).

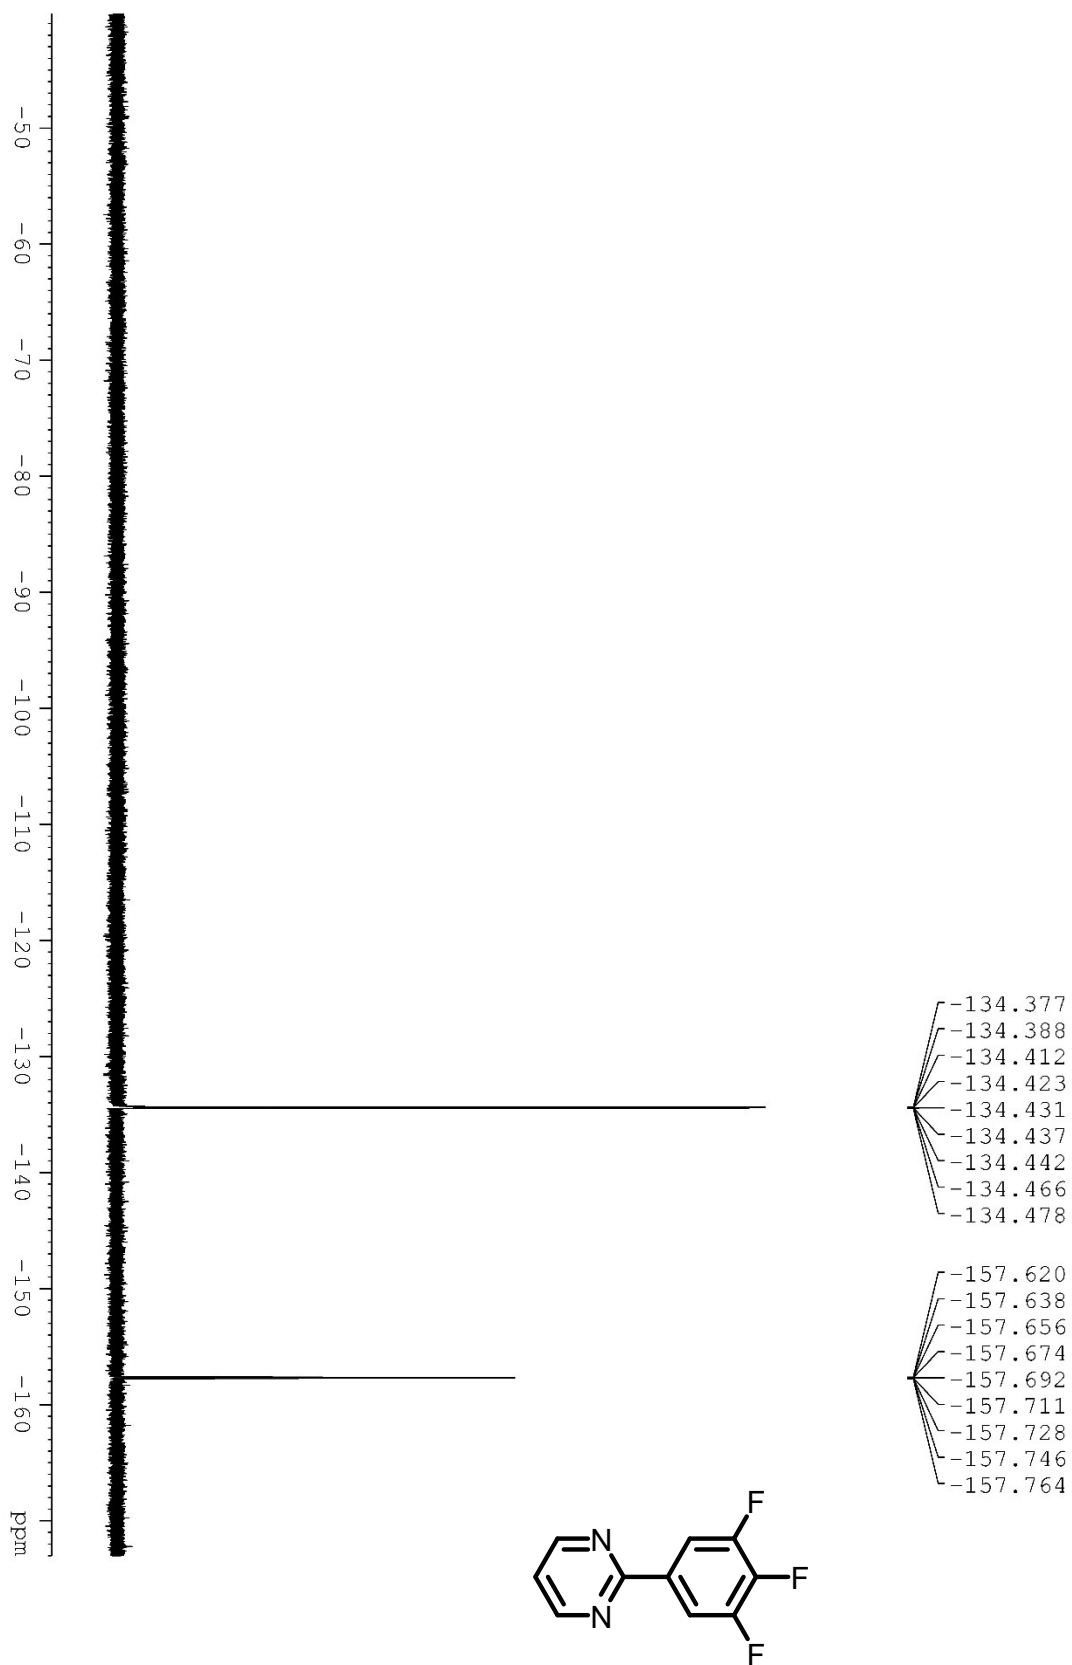

**10-(2,6-difluoro-4-(pyrimidin-2-yl)phenyl)-9,9-dimethyl-9,10-dihydroacridine (4)**

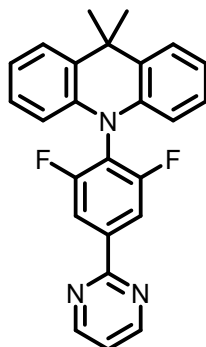

A mixture of compound **2** (0.6221 g, 3 mmol), 9-dimethyl-9,10-dihydroacridine (0.7542 g, 3.0 mmol) and Cs<sub>2</sub>CO<sub>3</sub> (1.476 g, 4.5 mmol) were dissolved in DMSO (3 mL) and reacted at 120 °C under argon for 12 hr. After the reaction, the solvent was removed by vacuum distillation. The residue was dissolved in DCM and washed with water and saturated NaCl solution. The organic layer was dried by anhydrous MgSO<sub>4</sub>. The crude was further purified through chromatography with Hexanes/ DCM = 1/2 to DCM as eluent to afford purified product **4** as a white solid (0.7902 g, 66 % yield).

<sup>1</sup>H NMR (400 MHz, Chloroform-*d*<sub>1</sub>): δ 8.86 (d, *J* = 4.8 Hz, 2 H), δ 8.28 (d, *J* = 8.4 Hz, 2 H), δ 7.48 (d, *J* = 7.2 Hz, 2 H), δ 7.29 (t, *J* = 4.8 Hz, 1 H), δ 7.05-6.96 (m, 4 H), δ 6.40 (d, *J* = 7.6 Hz, 2 H), δ 1.69 (s, 6 H); <sup>13</sup>C NMR (100 MHz, Chloroform-*d*<sub>1</sub>): δ 162.16, 161.52 (dd, <sup>1</sup>*J*<sub>CF</sub> = 253 Hz, <sup>2</sup>*J*<sub>CF</sub> = 5 Hz), 157.50, 140.29, 139.08, 131.00, 126.75, 125.23, 121.60, 120.16, 113.04, 112.69, 112.45, 36.11, 30.58; HRMS calcd. for C<sub>25</sub>H<sub>20</sub>F<sub>2</sub>N<sub>3</sub> (M+1<sup>+</sup>) 400.1620, obsd. 400.1607

Figure S12. <sup>1</sup>H NMR spectrum of compound (4).

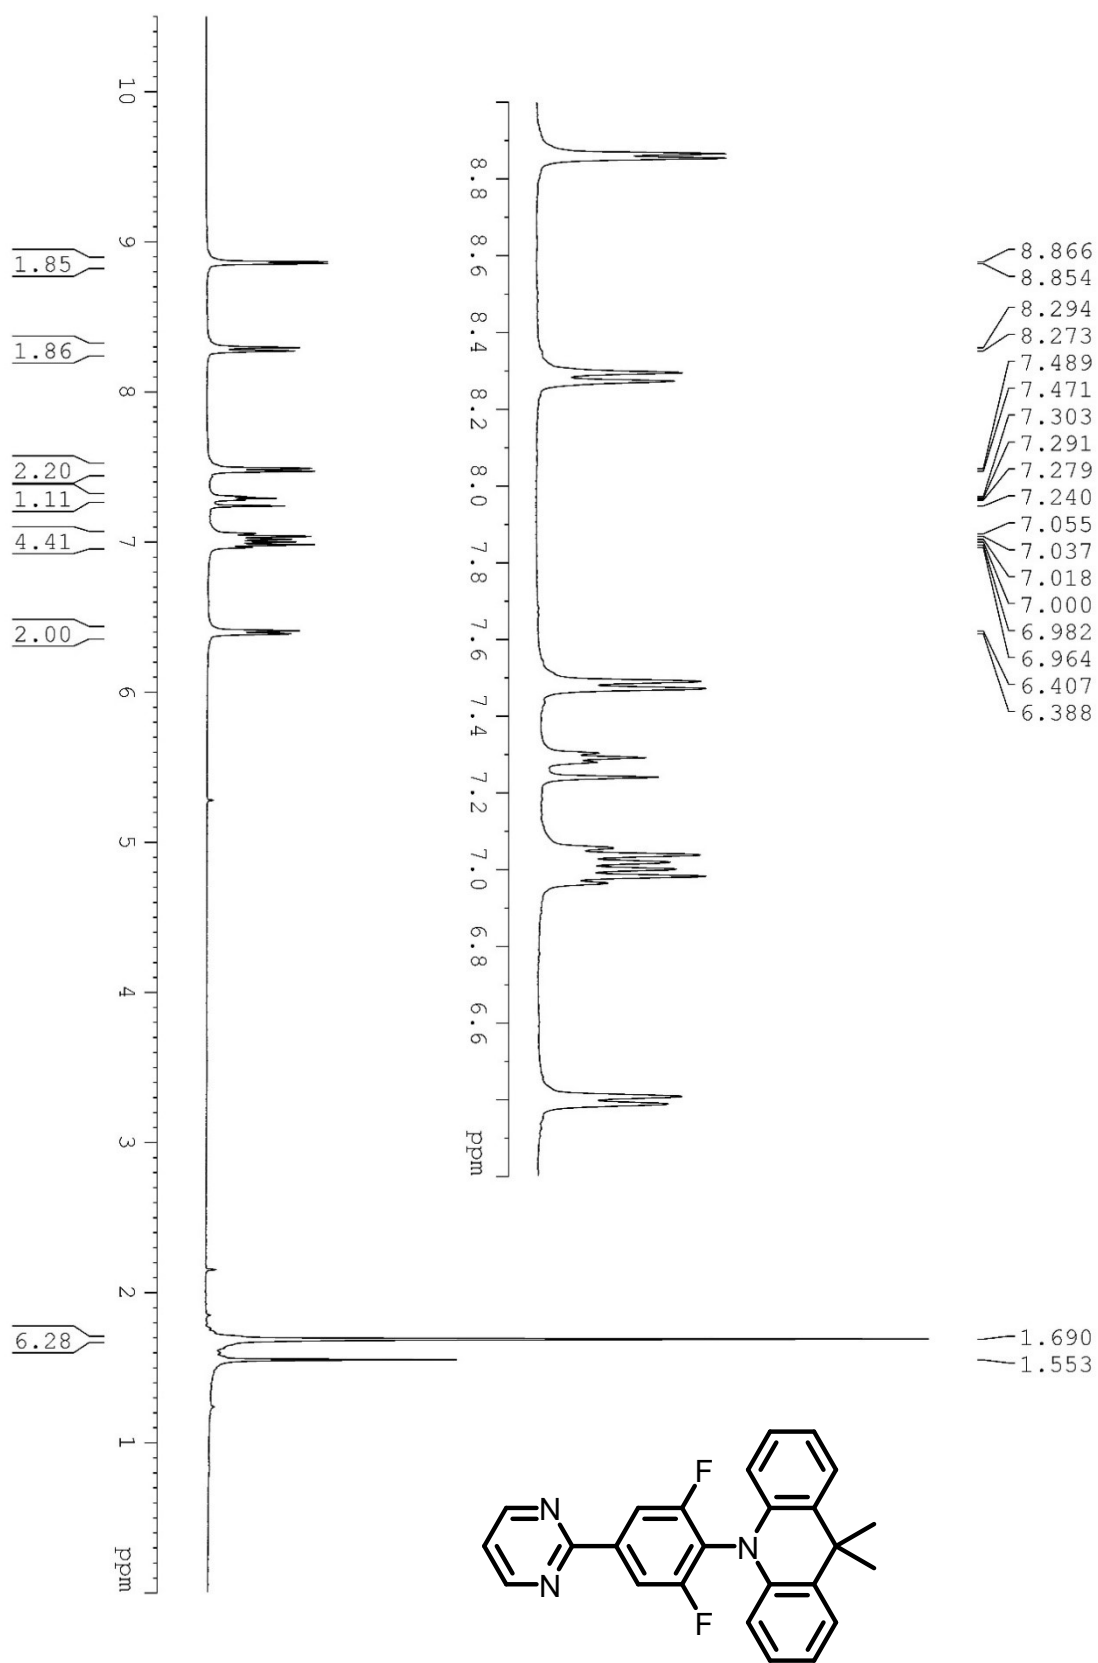

Figure S13.  $^{13}\text{C}$  NMR spectrum of compound (4).

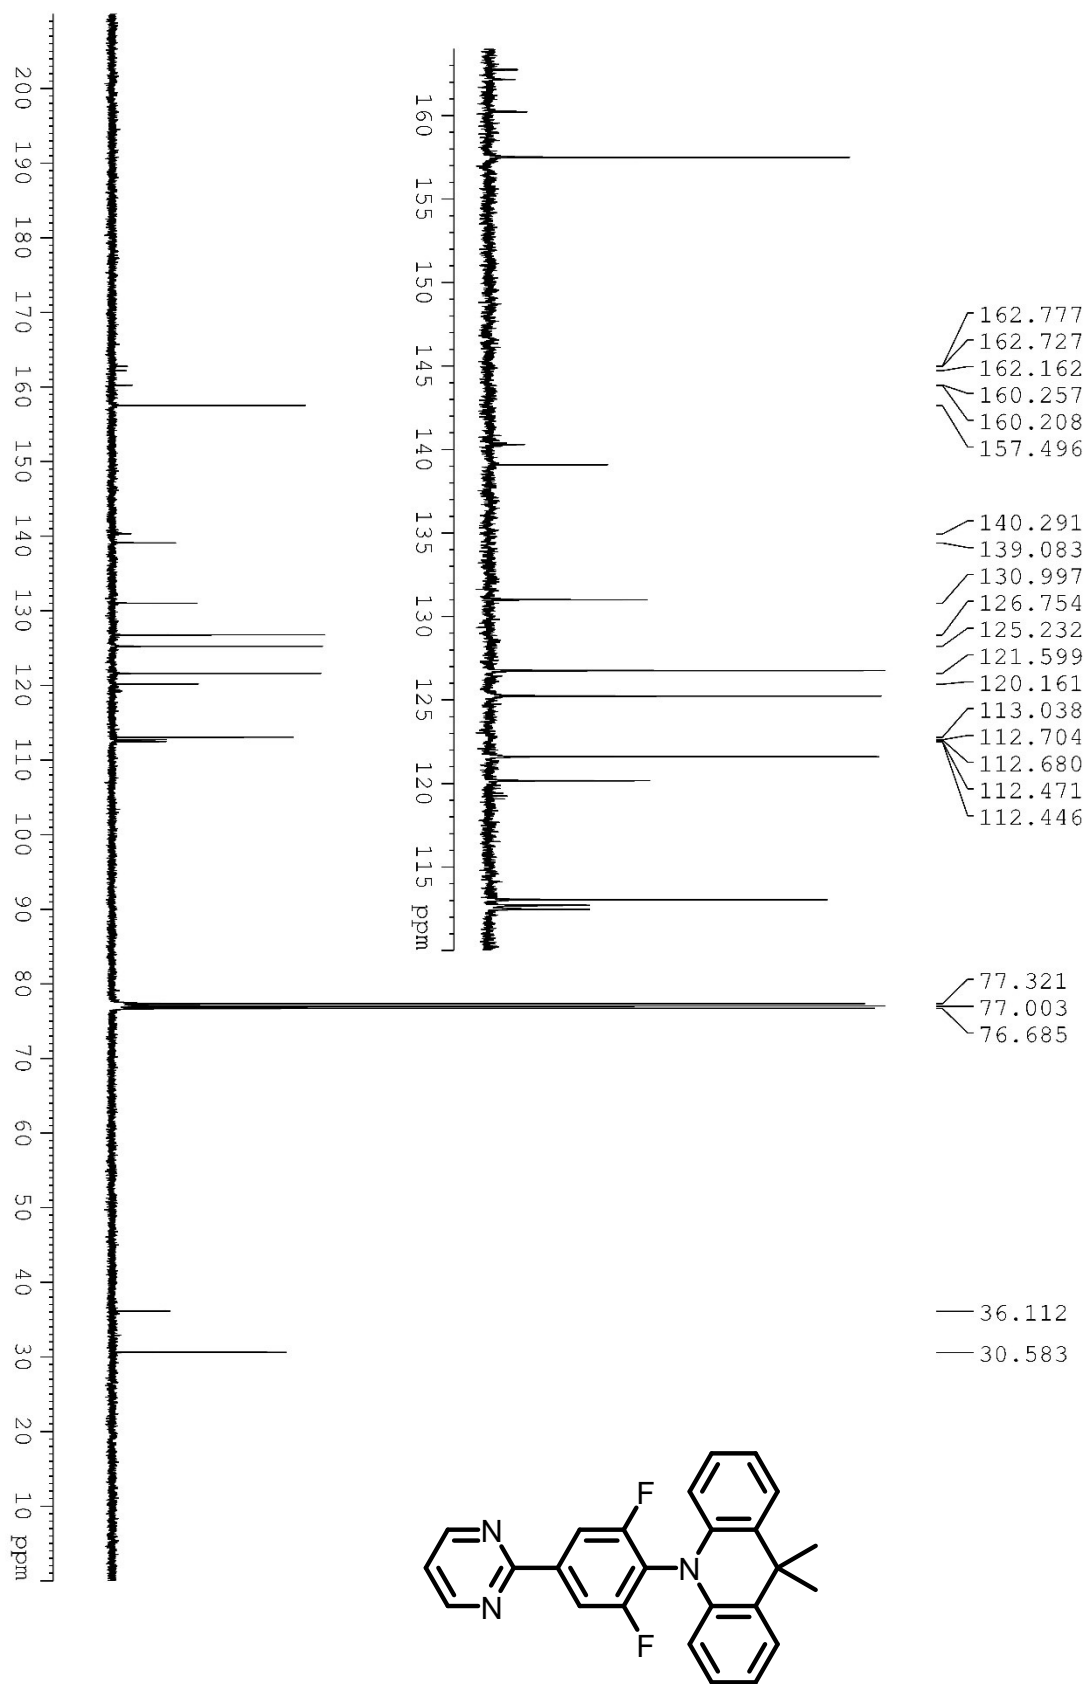

Figure S14.  $^{19}\text{F}$  NMR spectrum of compound (4).

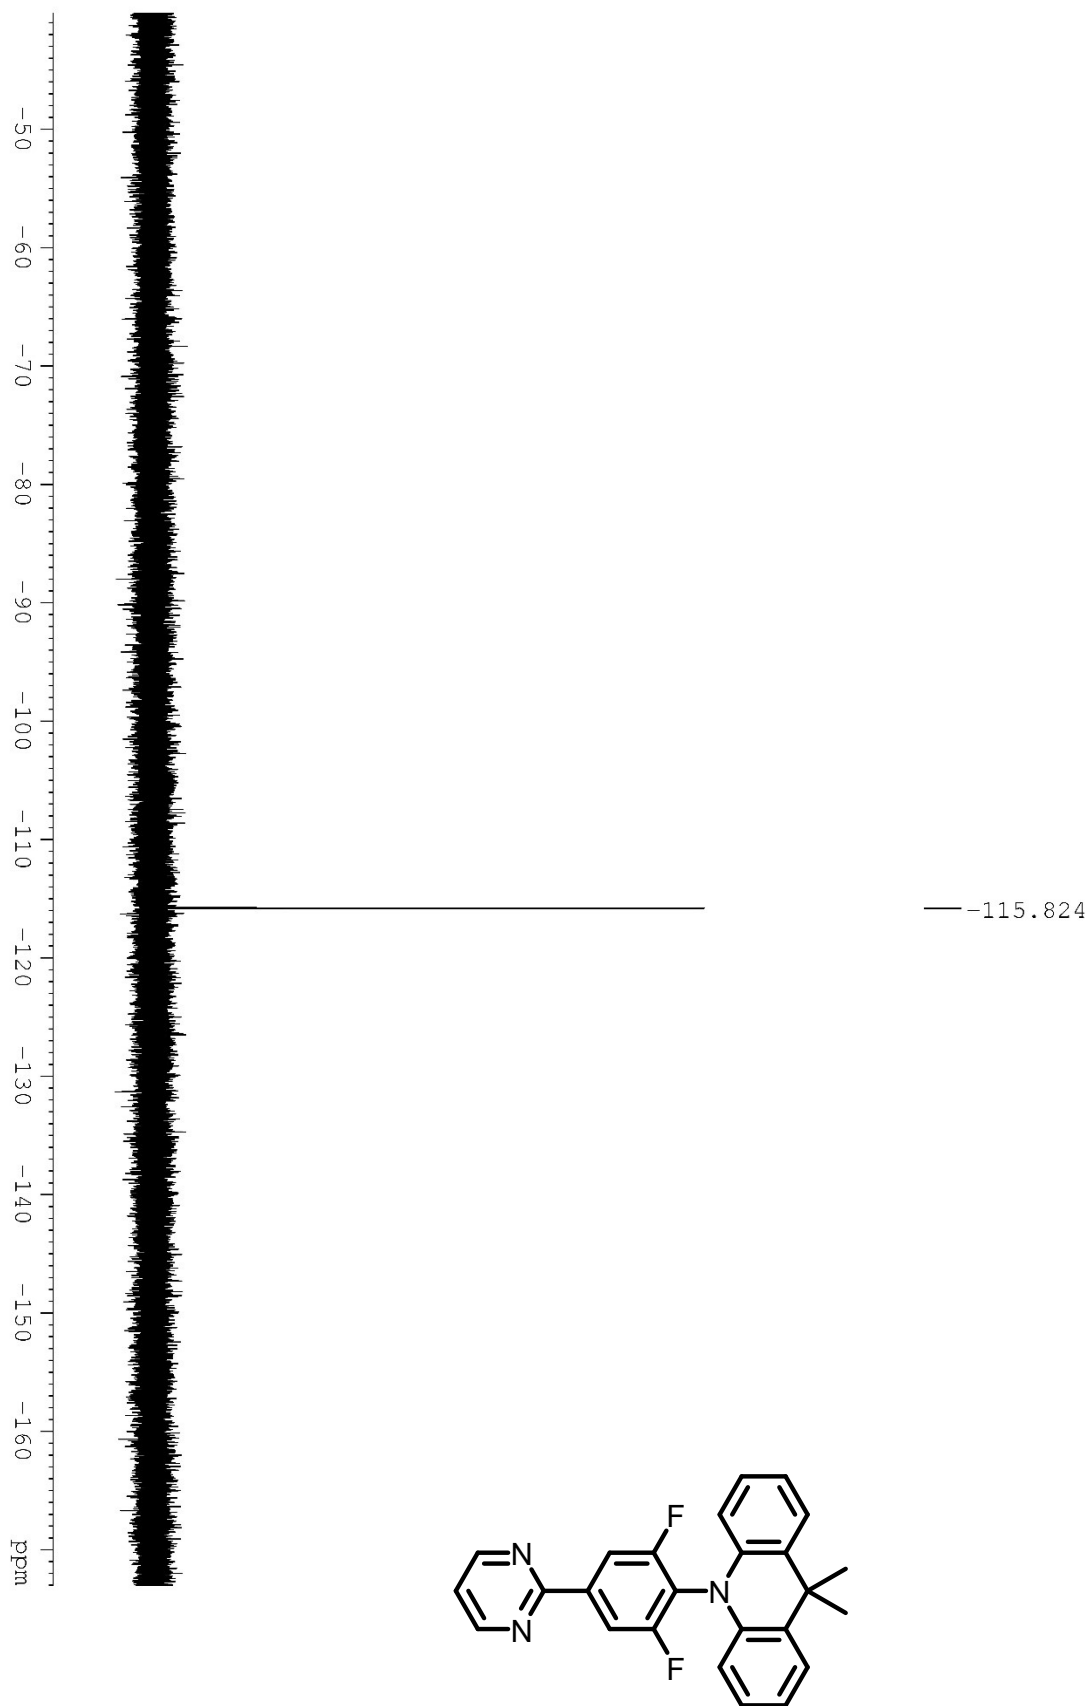

**10-(2,6-di(9H-carbazol-9-yl)-4-(pyrimidin-2-yl)phenyl)-9,9-dimethyl-9,10-dihydroacridine (4Ac35CzPy)**

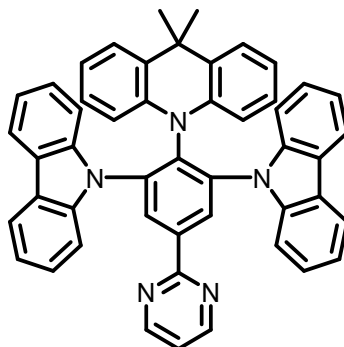

A mixture of compound **4** (0.4002 g, 1.0 mmol), carbazole (0.4175 g, 2.5 mmol) and  $\text{Cs}_2\text{CO}_3$  (0.8247 g, 2.5 mmol) were dissolved in DMSO (1.5 mL) and reacted at 120 °C under argon for 12 hours. After the reaction, the solvent was removed by vacuum distillation. The residue was dissolved in DCM and washed with water and saturated NaCl solution. The organic layer was dried by anhydrous  $\text{MgSO}_4$ . The crude was further purified through chromatography with Hexanes/ DCM = 1/2 to 1/4 as eluent to afford purified product. The product was further recrystallized in the mixture solution of DCM, acetone, and Hexanes to obtain yellow crystals (0.3540 g, 51 %).

$^1\text{H}$  NMR (400 MHz, Chloroform- $d_7$ ):  $\delta$  9.05 (s, 2 H),  $\delta$  8.85 (d,  $J = 4.8$  Hz, 2 H),  $\delta$  7.83-7.81 (m, 4 H),  $\delta$  7.33-7.30 (m, 4 H),  $\delta$  7.28 (t,  $J = 4.8$  Hz, 1 H),  $\delta$  7.08-7.02 (m, 9 H),  $\delta$  6.73 (d,  $J = 8$  Hz, 2 H),  $\delta$  6.53 (d,  $J = 8$  Hz, 2 H),  $\delta$  6.38 (t,  $J = 8$  Hz, 2 H), 6.21 (t,  $J = 8$  Hz, 2 H), 0.72 (s, 6 H);  $^{13}\text{C}$  NMR (100 MHz,  $\text{CD}_2\text{Cl}_2$ ):  $\delta$  163.17, 158.24, 140.98, 139.92, 139.51, 136.96, 135.49, 130.89, 130.10, 126.97, 125.78, 125.27, 123.98, 120.96, 120.66, 120.54, 120.22, 115.54, 111.39, 34.93, 34.71; HRMS calcd. for  $\text{C}_{49}\text{H}_{36}\text{N}_5$  ( $\text{M}+1^+$ ) 694.2965, obsd. 694.2925; Elemental analysis calcd. for C (84.82%), N (10.09%), H (5.08%), obsd. C (84.850%), N (10.14%), H (4.964%)





Figure S16.  $^{13}\text{C}$  NMR spectrum of 4Ac35CzPy.

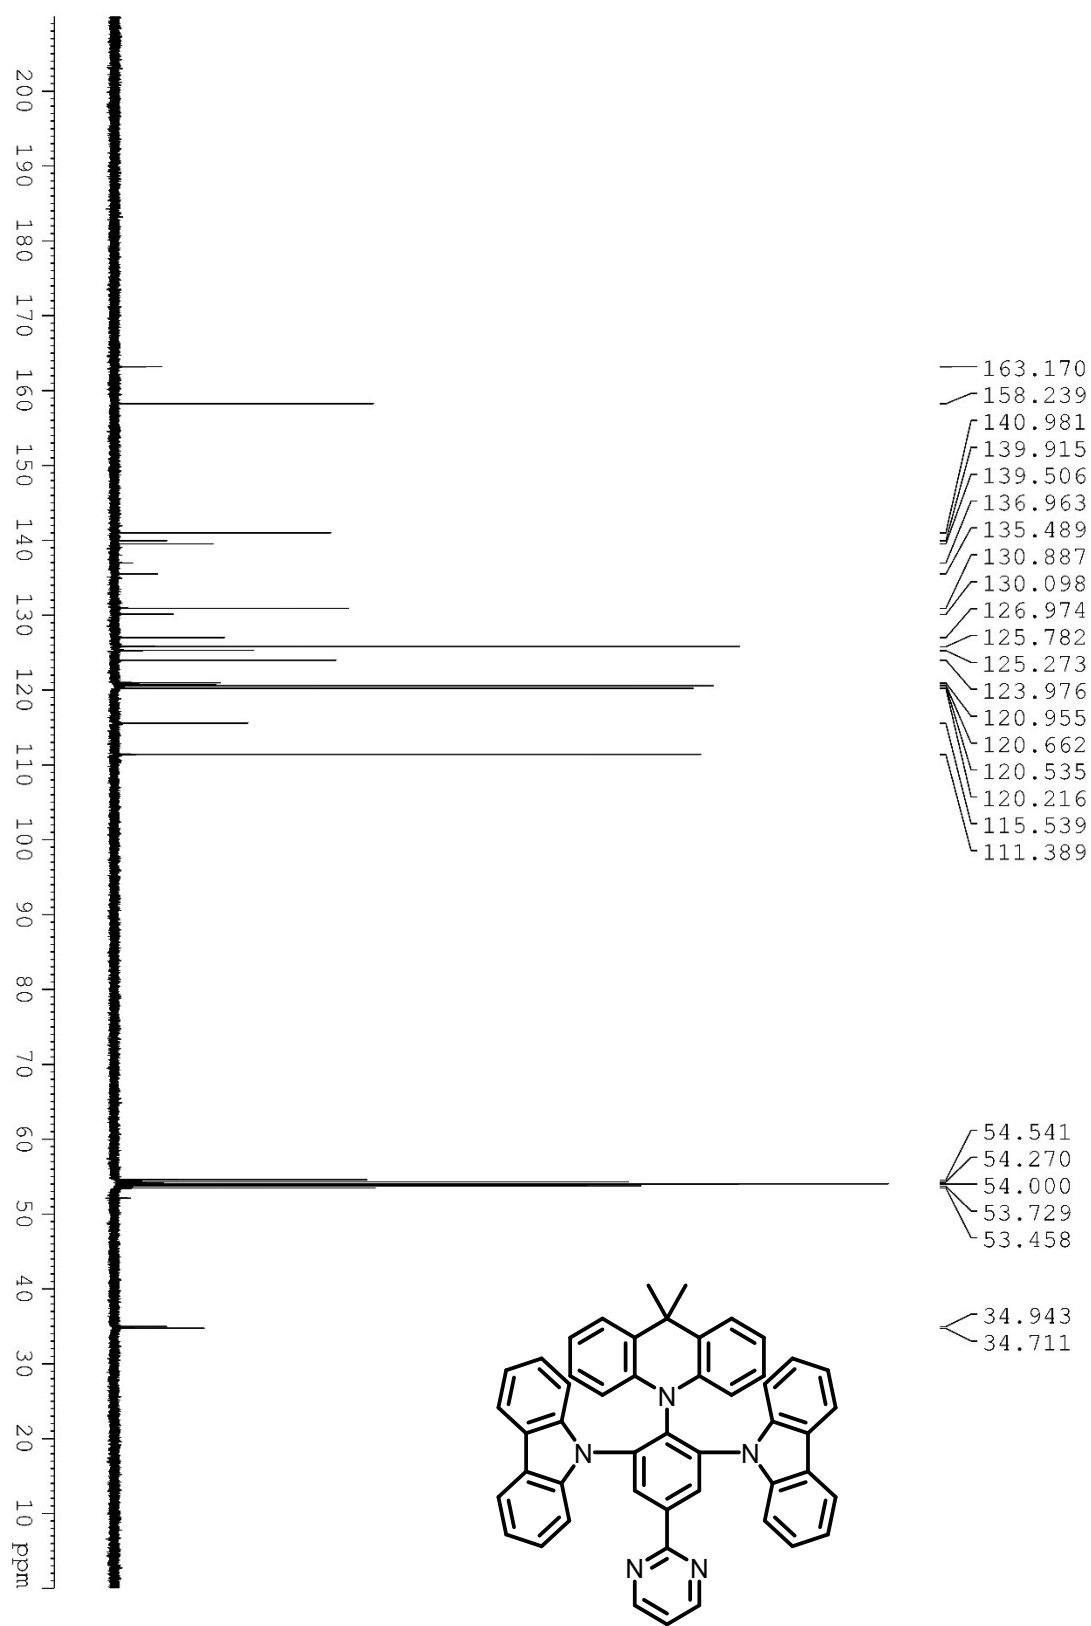

(a)

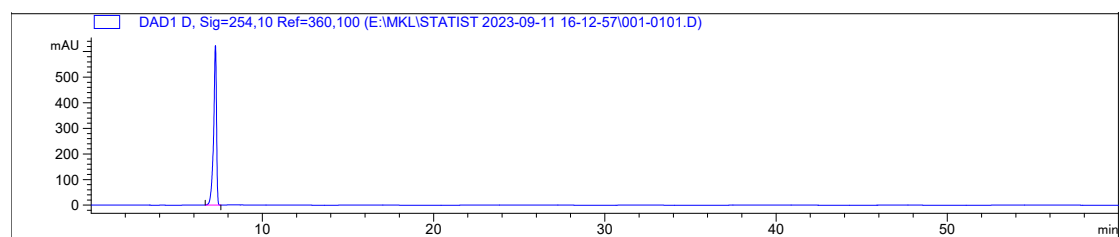

(b)

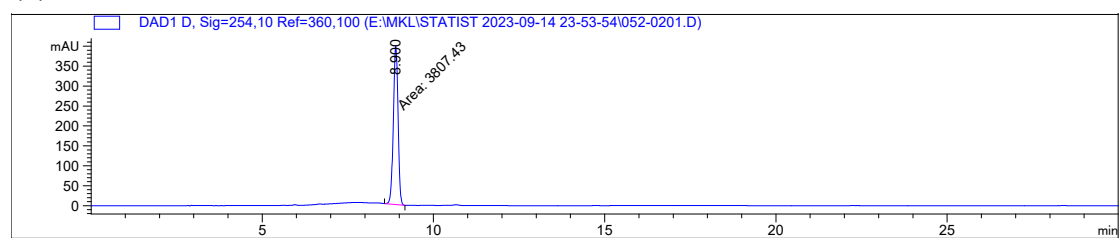

**Figure S17.** High performance liquid chromatography (HPLC) spectra of (a) **4Ac25CzPy** and (b) **4Ac35CzPy**

國立台灣大學理學院貴重儀器使用中心 元素分析儀報告書

Precision Instrumentation Center—Elemental Analysis Report  
College of Science, National Taiwan University

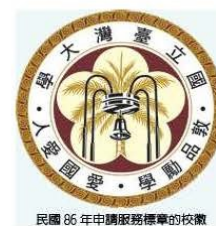

說明：1.本文件為學術檢測成果，不作認證、法律訴訟及商業廣告使用。  
This result is for academic use only, not to be used for any judicial or commercial advertising purpose.

2. Instrument：德國 elementar UNI cube 型 (for NCSH, German)

Accuracy:  $\pm 0.1\%$   
Precision:  $\pm 0.2\%$   
Inaccuracy of instrument:  $\pm 0.3\%$

3.儀器負責人：汪根權教授                      技術員：陸靖蔚  
Instrument Director: Prof. Wong, Ken-Tsung      Operator: Ching-Wei Lu

Web. NO.      52023080025  
User name     李怡蓁  
Supervisor    梁文傑  
Department   台大 化學系  
Acceptance date      2023/9/1  
Analysis date        2023/9/4

| Sample code  | Date Time  | Weight(mg) | Grp      | N%     | C%     | S%    | H%    | Repeat | Charge |
|--------------|------------|------------|----------|--------|--------|-------|-------|--------|--------|
| acetanilide  | 2023-09-04 | 4.307      | standard | 10.360 | 71.090 | 0.000 | 6.710 |        |        |
| standard 測出值 | 2023-09-04 | 4.024      |          | 10.360 | 71.050 | 0.000 | 6.702 |        |        |
| 4AC25CzPy    | 2023-09-04 | 4.044      |          | 10.090 | 84.660 |       | 4.926 | 1      |        |
| 4AC25CzPy    | 2023-09-04 | 4.230      |          | 10.090 | 84.630 |       | 4.949 | 1      | \$ 240 |
| 4AC35CzPy    | 2023-09-04 | 4.182      |          | 10.140 | 84.850 |       | 4.964 | 1      |        |
| 4AC35CzPy    | 2023-09-04 | 4.089      |          | 10.100 | 84.690 |       | 4.977 | 1      | \$ 240 |
|              |            |            |          |        |        |       |       | 4      | \$ 480 |

Figure S18. Elemental analysis of 4Ac25CzPy and 4Ac35CzPy

The elemental analysis measurements in this study were conducted by the Precision Instrumentation Center at National Taiwan University.

**Table S1.** TDA-B3LYP/def2-TZVP(-f)/CPCM(2-MeTHF) vertical excitation energies (in eV) for singlet and triplet excited states of **4Ac25CzPy** and **4Ac35CzPy**. The  $S_0$  minimum structure was used in the calculation of vertical excitation energies.

| 4Ac25CzPy      |       |                |       | 4Ac35CzPy      |       |                |       |
|----------------|-------|----------------|-------|----------------|-------|----------------|-------|
| Singlet States |       | Triplet States |       | Singlet States |       | Triplet States |       |
| S <sub>1</sub> | 2.853 | T <sub>1</sub> | 2.782 | S <sub>1</sub> | 2.731 | T <sub>1</sub> | 2.561 |
| S <sub>2</sub> | 3.219 | T <sub>2</sub> | 3.082 | S <sub>2</sub> | 3.192 | T <sub>2</sub> | 3.056 |
| S <sub>3</sub> | 3.404 | T <sub>3</sub> | 3.320 | S <sub>3</sub> | 3.219 | T <sub>3</sub> | 3.101 |
| S <sub>4</sub> | 3.413 | T <sub>4</sub> | 3.335 | S <sub>4</sub> | 3.266 | T <sub>4</sub> | 3.199 |

### Calculation of Adiabatic Singlet-Triplet Energy Gap, $\Delta E_{ST}^{Adia}$ , Spin-orbit coupling matrix elements, and reorganization energies

The adiabatic singlet-triplet energy gap was calculated by taking the energy difference of the  $S_1$  and  $T_1$  states at their respective minimum geometries.

$$\Delta E_{ST}^{Adia} = E_{S_1}(R_{S1}) - E_{T_1}(R_{T1}),$$

where  $E_i(R_j)$  refers to the energy of the  $i^{\text{th}}$  state at the  $j^{\text{th}}$  state geometry.

The reorganization energies were calculated as follows:

$$\lambda_S = E_{S_1}(R_{T1}) - E_{S_1}(R_{S1}),$$

$$\lambda_T = E_{T_1}(R_{S1}) - E_{T_1}(R_{T1}).$$

The spin-orbit coupling matrix elements were calculated based on the  $T_1$  state's minimum geometry. From here, the ISC and RISC rates were estimated using the semiclassical Marcus theory.

$$k = \frac{2\pi}{\hbar} V^2 \sqrt{\frac{1}{4\pi k_b T}} \exp\left[-\frac{(\Delta E_{ST}^{Adia} + \lambda)^2}{4k_b T \lambda}\right]$$

Here, the temperature was set to  $T=300\text{K}$ . In calculating the ISC rate constant,  $\lambda = \lambda_T$

and  $\Delta E_{ST}^{Adia} = E_{T_1}(R_{T1}) - E_{S_1}(R_{S1})$ . Meanwhile, in calculating the RISC rate constant,

$$\lambda = \lambda_S \text{ and } \Delta E_{ST}^{Adia} = E_{S_1}(R_{S1}) - E_{T_1}(R_{T1}), \quad V^2 = \frac{1}{3} |\langle T_1 | \hat{H}_{SO} | S_1 \rangle|^2$$

**Table S2.** Calculated adiabatic singlet-triplet energy gap  $\Delta E_{ST}^{Adia}$  (eV), spin-orbit coupling matrix elements  $|\langle T_1 | \hat{H}_{SO} | S_1 \rangle|$  (cm<sup>-1</sup>), reorganization energies  $\lambda_S$  and  $\lambda_T$  (eV), and ISC and RISC rate constants  $k_{ISC}$  and  $k_{RISC}$  (s<sup>-1</sup>).

| Species   | $\Delta E_{ST}^{Adia}$<br>(eV) | $ \langle T_1   \hat{H}_{SO}   S_1 \rangle $<br>(cm <sup>-1</sup> ) | $\lambda_T$<br>(eV) | $k_{ISC}$<br>(s <sup>-1</sup> ) | $\lambda_S$<br>(eV) | $k_{RISC}$<br>(s <sup>-1</sup> ) |
|-----------|--------------------------------|---------------------------------------------------------------------|---------------------|---------------------------------|---------------------|----------------------------------|
| 4Ac25CzPy | 0.038                          | 0.224                                                               | 0.0134              | $2.37 \times 10^7$              | 0.0795              | $2.82 \times 10^6$               |
| 4Ac35CzPy | 0.088                          | 0.210                                                               | 0.0241              | $4.70 \times 10^6$              | 0.0742              | $4.49 \times 10^5$               |

**Table S3.** TDA-B3LYP-D3BJ/def2-TZVP(-f)/CPCM(2-MeTHF) natural transition orbital (NTO) analysis for the  $S_1$  and  $T_1$  states of 4Ac25CzPy and 4Ac35CzPy at their minimum respective excited state minimum structures.

| Species   | $S_0 \rightarrow S_1$                                                               |                                                                                     | $S_0 \rightarrow T_1$                                                                |                                                                                       |
|-----------|-------------------------------------------------------------------------------------|-------------------------------------------------------------------------------------|--------------------------------------------------------------------------------------|---------------------------------------------------------------------------------------|
|           | Hole                                                                                | Electron                                                                            | Hole                                                                                 | Electron                                                                              |
| 4Ac25CzPy | 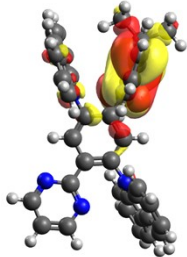 |  |  |  |
| 4Ac35CzPy |  |  |  |  |

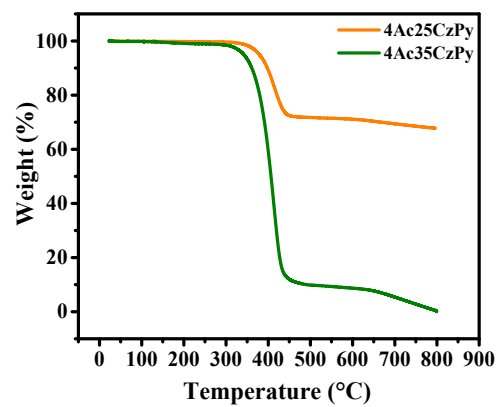

**Figure S19.** Thermal gravity analysis (TGA) curves of **4Ac25CzPy** and **4Ac35CzPy**

(a)

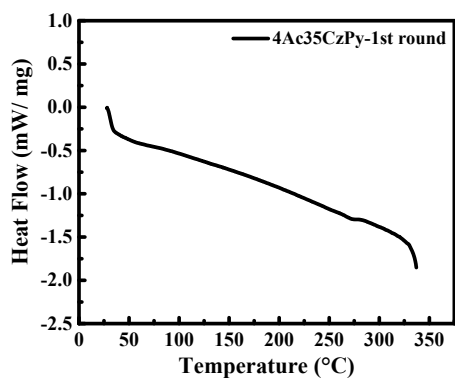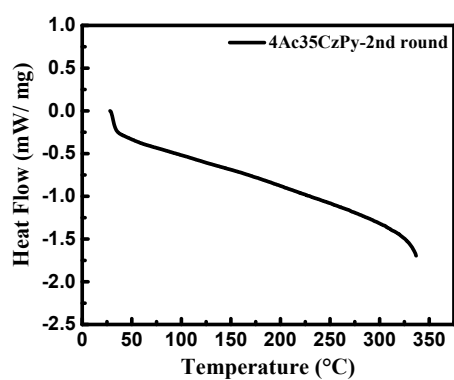

(b)

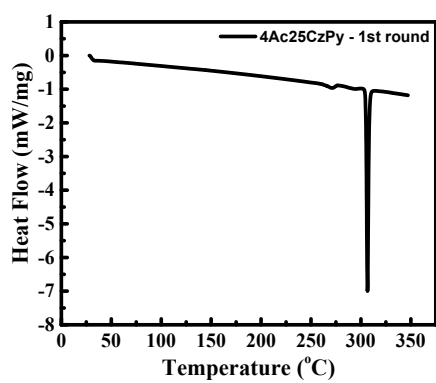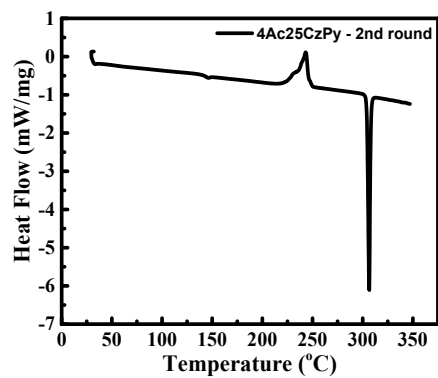

**Figure S20.** Differential scanning calorimetry (DSC) curves of (a) **4Ac35CzPy** and (b) **4Ac25CzPy**

(a)

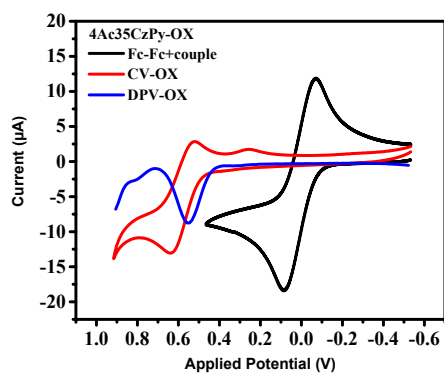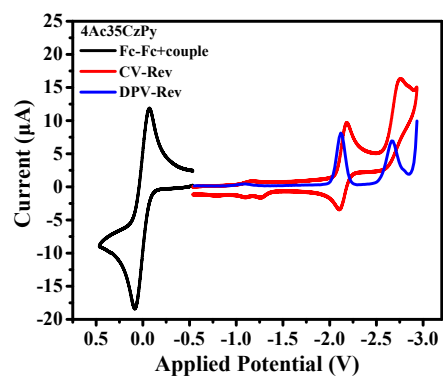

(b)

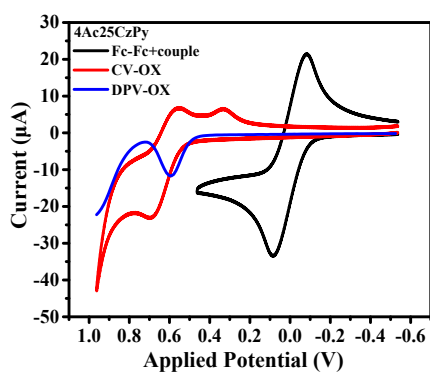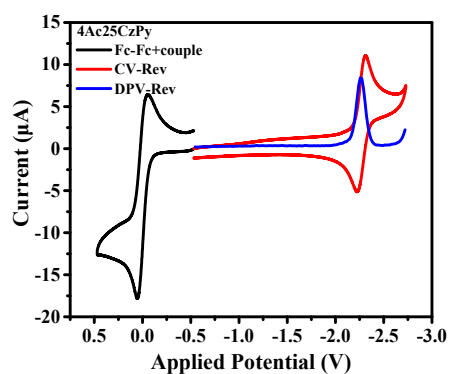

**Figure S21.** Cyclic voltammogram (CV) and differential pulse voltammetry (DPV) of  
(a) 4Ac35CzPy and (b) 4Ac25CzPy



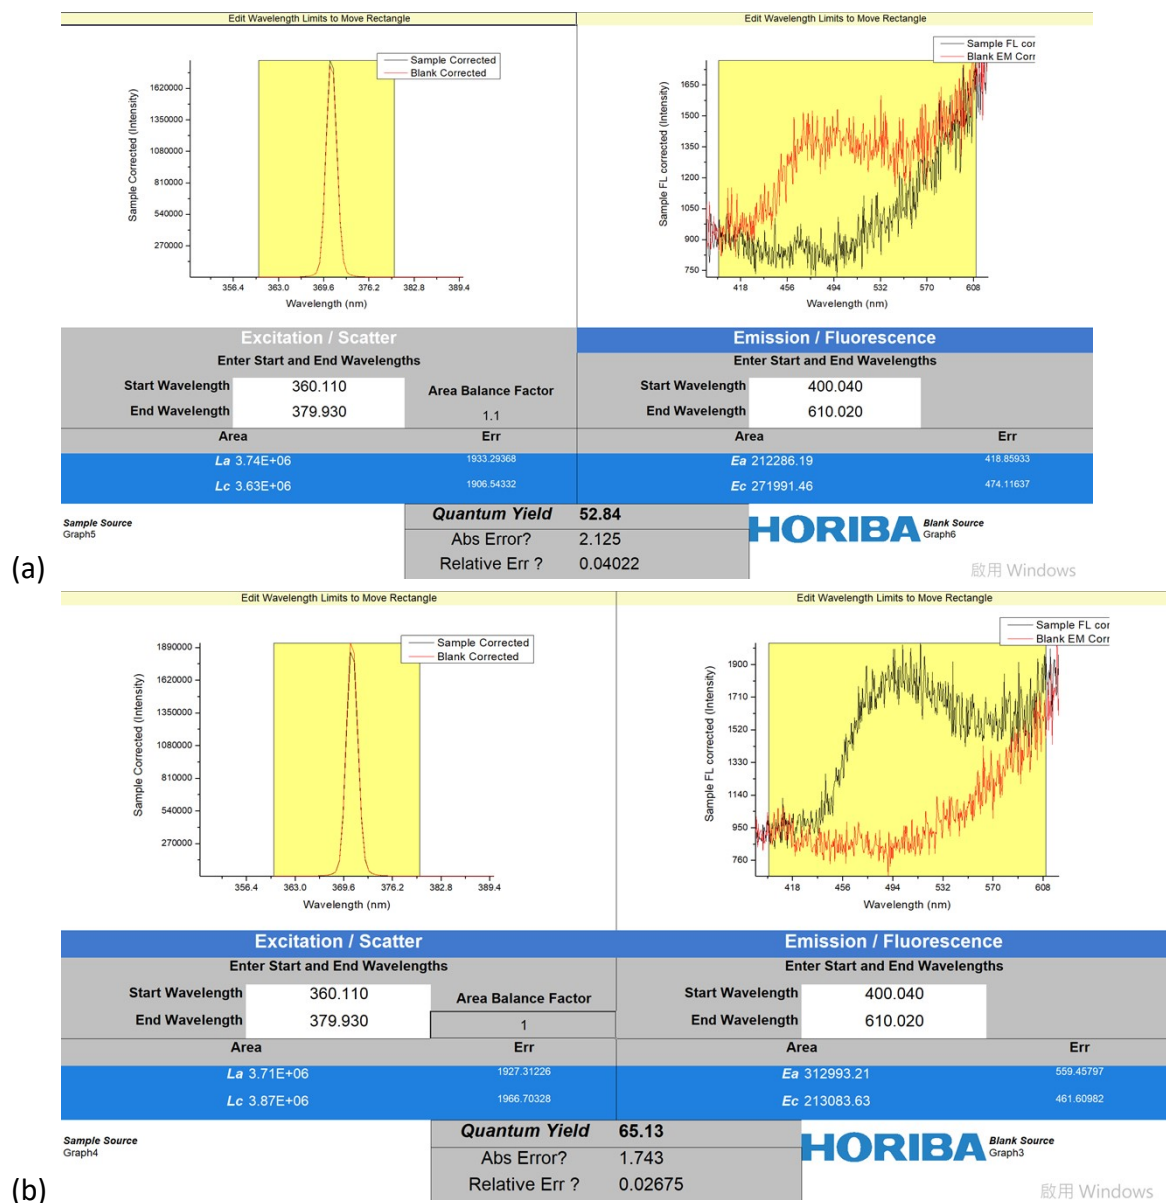

**Figure S22.** PLQY of mixed film (a) 4Ac25CzPy doped *o*-DiCzbZ; (b) 4Ac35CzPy doped *o*-DiCzbZ.

## Analysis of rate constant for 4Ac25CzPy and 4Ac35CzPy

With the PL efficiencies ( $\Phi_{total}/\Phi_{prompt}/\Phi_{delayed}$ ) and decay times ( $\tau_p, \tau_d$ ) of 4Ac25CzPy and 4Ac35CzPy-doped films, we can evaluate the rate constants of 4Ac25CzPy and 4Ac35CzPy-doped films via following equations.

$$K_{r,s} = \Phi_{prompt} k_p \quad (1)$$

$$K_{ISC} = (1 - \Phi_{prompt}) k_p \quad (2)$$

$$K_{rISC} = \frac{k_p k_d \Phi_{delayed}}{K_{ISC} \Phi_{prompt}} \quad (3)$$

$$K_{nr,T} = k_d - \Phi_{prompt} K_{rISC} \quad (4)$$

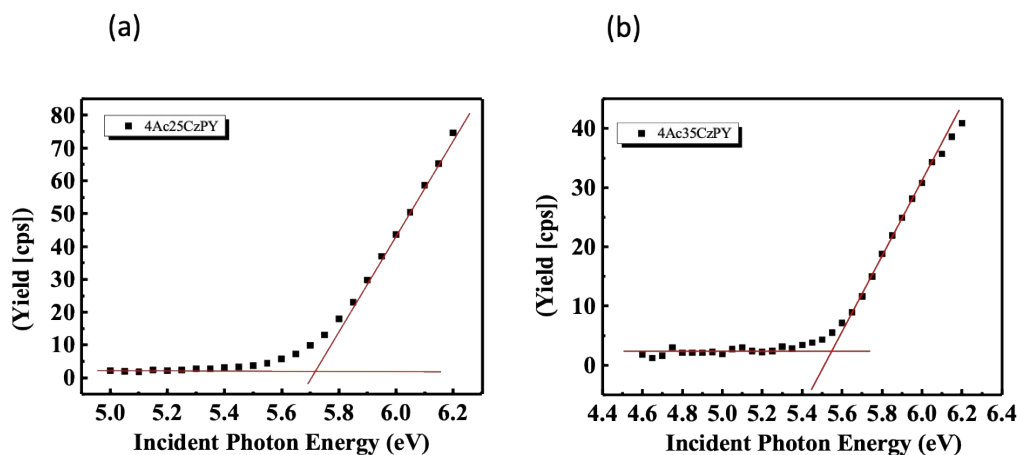

**Figure S23.** Photoelectron spectra for (a) 4Ac25CzPy and (b) 4Ac35CzPy measured by AC-II.

**Table S4.** Device structure of OLEDs with **4Ac35CzPy** as emitter.

| Device | HTL<br>TAPC | EBL<br>mCP | EML<br>o-DiCzBz/ X%<br>4Ac35CzPy | ETL<br>DPPS | cathode<br>LiF/Al |
|--------|-------------|------------|----------------------------------|-------------|-------------------|
| 3A-5   |             |            | 30 /9%                           |             |                   |
| 3A-2   |             |            | 30 /12%                          | 55          |                   |
| 3A-6   |             |            | 30 /15%                          |             |                   |
| 3A-9   |             |            |                                  | 50          |                   |
| 3A-2   | 50          | 10         | 30 /12%                          | 55          | 0.8/120           |
| 3A-10  |             |            |                                  | 60          |                   |
| 3A-11  |             |            |                                  | 65          |                   |
| 3A-10  |             |            | 25/12%                           |             |                   |
| 3A-2   |             |            | 30/12%                           | 55          |                   |
| 3A-11  |             |            | 35/12%                           |             |                   |

unit: nm

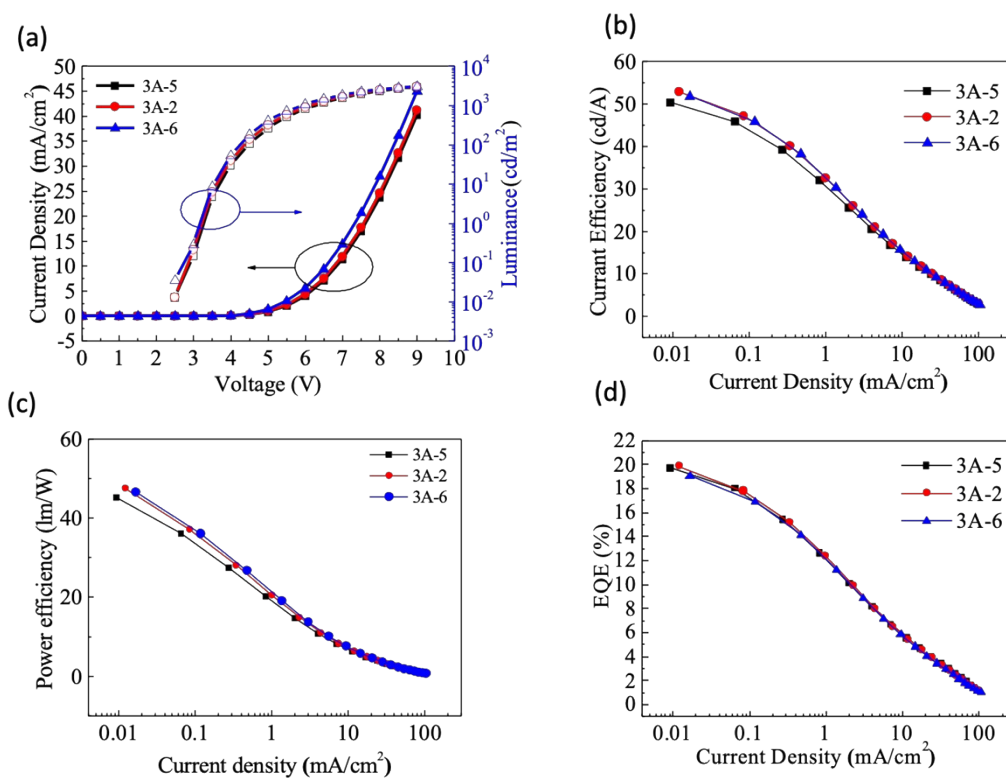

**Figure S24.** Device performance of (a) J-V; (b)CE-J; (c)PE-J; (d) EQE-J for OLEDs (3A-5, 3A-2, 3A-6).

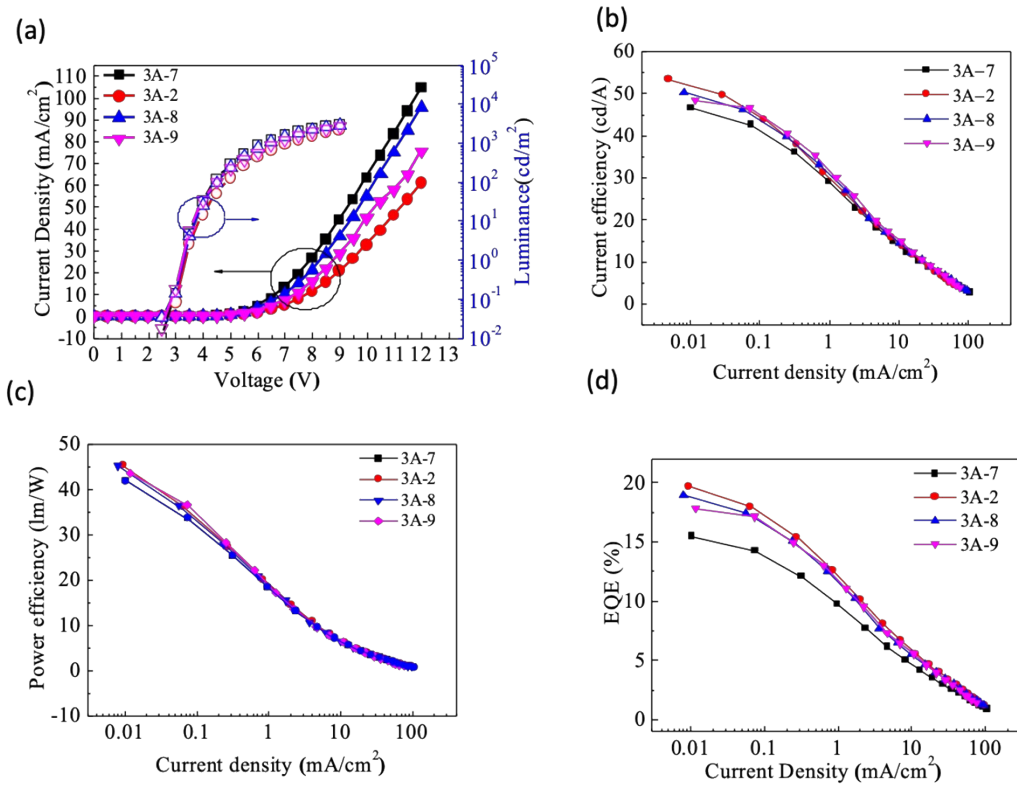

**Figure S25.** Device performance of (a) J-V; (b)CE-J; (c)PE-J; (d) EQE-J for (3A-7, 3A-2, 3A-8, 3A-9).

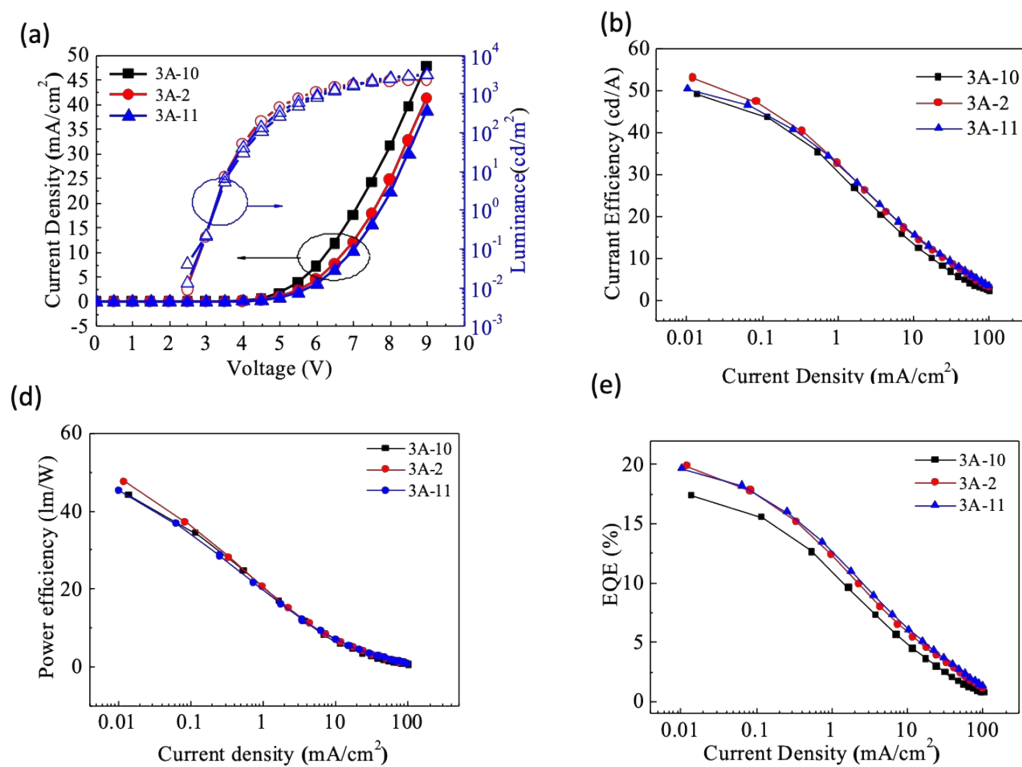

**Figure S26.** Device performance of (a) J-V; (b)CE-J; (d) PE-J; (e) EQE-J for (3A-10, 3A-2, 3A-11).

**Table S5.** Device performance for OLEDs with **4Ac35CzPy** as emitter.

| Device      | EML/ETL (%)<br>(nm) | Voltage <sup>a</sup> (V) | Luminance <sup>b</sup> (cd/m <sup>2</sup> ) | CE <sup>c</sup> (cd/A)   | PE <sup>c</sup> (lm/W)   | EQE <sup>c</sup> (%)    | CIE <sup>d</sup> (x,y) |
|-------------|---------------------|--------------------------|---------------------------------------------|--------------------------|--------------------------|-------------------------|------------------------|
| 3A-5        | 9%, 30 / 55         | 6.83                     | 3215                                        | 50.37/39.65/18.49        | 45.29/27.92/9.34         | 19.67/15.53/7.54        | (0.178,0.382)          |
| <b>3A-2</b> | <b>12%, 30 / 55</b> | <b>6.76</b>              | <b>3288</b>                                 | <b>52.92/42.45/20.18</b> | <b>47.59/30.93/10.35</b> | <b>19.83/15.98/7.63</b> | <b>(0.180,0.395)</b>   |
| 3A-6        | 15%, 30 / 55        | 6.55                     | 3200                                        | 51.88/41.28/20.12        | 46.66/30.56/10.78        | 19.02/15.22/7.22        | (0.181,0.397)          |
| 3A-9        | 12%, 30 / 50        | 6.68                     | 3190                                        | 46.53/36.83/16.69        | 41.84/25.26/7.59         | 15.47/12.33/5.62        | (0.173,0.367)          |
| <b>3A-2</b> | <b>12%, 30 / 55</b> | <b>6.76</b>              | <b>3215</b>                                 | <b>52.92/42.45/20.18</b> | <b>47.59/30.93/10.35</b> | <b>19.83/15.98/7.63</b> | <b>(0.178,0.382)</b>   |
| 3A-10       | 12%, 30 / 60        | 6.98                     | 3293                                        | 50.27/39.27/18.13        | 45.21/27.04/8.99         | 18.92/14.79/6.85        | (0.182,0.395)          |
| 3A-11       | 12%, 30 / 65        | 7.38                     | 3036                                        | 48.49/36.89/18.54        | 43.61/24.07/8.66         | 17.8/13.58/6.87         | (0.186,0.412)          |
| 3A-10       | 12%, 25 / 55        | 6.29                     | 2271                                        | 48.95/39.28/16.94        | 44.07/25.52/7.66         | 17.35/14.01/6.11        | (0.179,0.386)          |
| <b>3A-2</b> | <b>12%, 30 / 55</b> | <b>6.76</b>              | <b>3288</b>                                 | <b>52.92/42.45/20.18</b> | <b>47.59/30.93/10.35</b> | <b>19.83/15.98/7.63</b> | <b>(0.180,0.395)</b>   |
| 3A-11       | 12%, 35 / 55        | 6.96                     | 3532                                        | 50.35/41.25/20.44        | 45.22/29.05/10.27        | 19.64/16.16/8.03        | (0.179,0.391)          |

<sup>a</sup> at J= 10 mA/cm<sup>2</sup>; <sup>b</sup> Maximum; <sup>c</sup> CE/PE/EQE measured at maximum/100 cd/m<sup>2</sup>/1000 cd/m<sup>2</sup>; <sup>d</sup> at 4 V

(a)

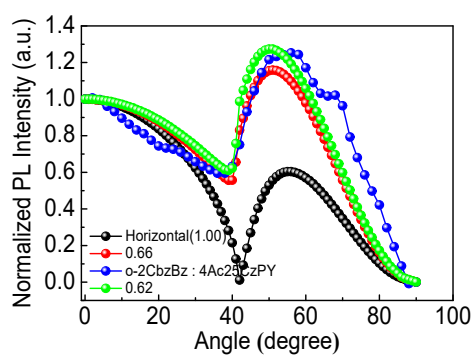

(b)

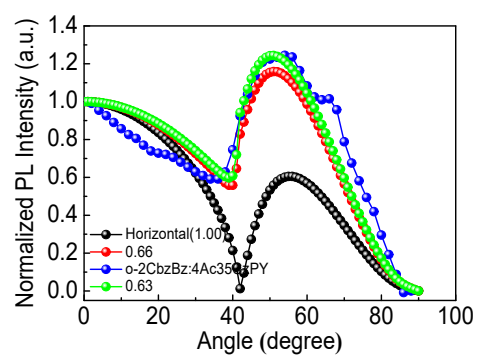

**Figure S27.** Angle dependent photoluminescence for (a) **4Ac25CzPy** and (b) **4Ac35CzPy**.
